Dennis M. Fisher, M.D., Editor

Anesthesiology  
1999; 91:1122-51  
© 1999 American Society of Anesthesiologists, Inc.  
Lippincott Williams & Wilkins, Inc.

# Anticoagulation Monitoring during Cardiac Surgery

## A Review of Current and Emerging Techniques

George J. Despotis, M.D.,\* Glenn Gravlee, M.D.,† Kriton Filos, M.D.,‡ Jerrold Levy, M.D.§

AFTER almost two decades of relative stability in anticoagulation practice and monitoring for cardiac surgery, recent developments call for review and reconsideration of these issues. The introduction of aprotinin in 1994 and the development and use of new thrombin (e.g., hirudin, argatroban), Xa (e.g., low-molecular-weight heparin compounds), and platelet (e.g., abciximab, eptifi-

bate, tirofiban) inhibitors and new fibrinolytic agents (e.g., recombinant tissue plasminogen activator) has complicated clinical management. Also, the introduction of antithrombin III (ATIII) concentrates has opened a new pathway to manage heparin resistance. The availability of heparin-bonded extracorporeal circuits has engendered clinical management controversies that test the clinician's knowledge and judgement.

This review describes and interprets the literature on these topics and includes a survey conducted in 1993 of heparin and protamine dosing and monitoring practices in the United States. Clinical scenarios involving either newer antithrombotic agents or disease states that render traditional monitoring obsolete are also discussed.

\* Associate Professor of Anesthesiology and Pathology, Departments of Anesthesiology and Pathology, Washington University School of Medicine.

† Professor of Anesthesiology, Chairman, Department of Anesthesiology, Allegheny University Hospitals—Allegheny General.

‡ Assistant Professor of Anesthesiology and Critical Care, Department of Anesthesiology and Critical Care Medicine, University of Patras School of Medicine.

§ Professor of Anesthesiology, Department of Anesthesiology, Emory University School of Medicine.

Received from the Departments of Anesthesiology and Pathology, Washington University School of Medicine, St. Louis, Missouri; the Department of Anesthesiology, Allegheny University Hospitals—Allegheny General, Pittsburgh, Pennsylvania; the Department of Anesthesiology and Critical Care Medicine, University of Patras School of Medicine, Patras, Greece; and the Department of Anesthesiology, Emory University School of Medicine, Atlanta, Georgia. Submitted for publication November 17, 1997. Accepted for publication April 13, 1999. Research support, honoraria, or consulting fees were provided from one or more of the following corporations: Rhone-Poulenc Rorer Pharmaceuticals, Inc., Collegeville, Pennsylvania; Acumetrics, Inc., San Diego, California; Genzyme Corporation, Cambridge, Massachusetts; Medtronic Blood Management, Parker, Colorado; International Technidyne, Edison, New Jersey; Boehringer Mannheim, Indianapolis, Indiana; Ciba Corning Diagnostics Corporation, Indianapolis, Indiana; Bayer Corporation, West Haven, Connecticut; and IBEX Technologies, Montreal, Canada.

Address reprint requests to Dr. Despotis: Department of Anesthesiology, Box 8054, Washington University School of Medicine, 660 South Euclid Avenue, St. Louis, Missouri 63110. Address electronic mail to: despotig@notes.wustl.edu

Key words: Aprotinin; bleeding; cardiopulmonary bypass; heparin; protamine.

## Overview of Coagulation in Cardiac Surgery

The hemostatic system limits hemorrhage when vascular integrity is compromised and includes several major components: platelets, von Willbrand factor (vWF), coagulation and fibrinolytic factors, and the blood vessel wall. The endothelium normally serves as a protective layer against hemostatic activation. When endothelium is denuded, activated platelets adhere to exposed subendothelium, a reaction largely mediated by vWF, and then aggregate to provide initial hemostasis. Platelets also provide an active phospholipid surface for interaction with coagulation factors. The coagulation system consists of a number of clotting active zymogens and cofactors and is subdivided into three pathways (i.e., intrinsic, extrinsic, and common) that ultimately lead to formation of a fibrin clot (fig. 1). Tissue factor activates the extrinsic pathway to form fibrin, which stabilizes the hemostatic platelet plug. Several important physiologic mechanisms counterbalance the propensity of both platelets (i.e., via prostacycline [PGI<sub>2</sub>], nitric oxide)

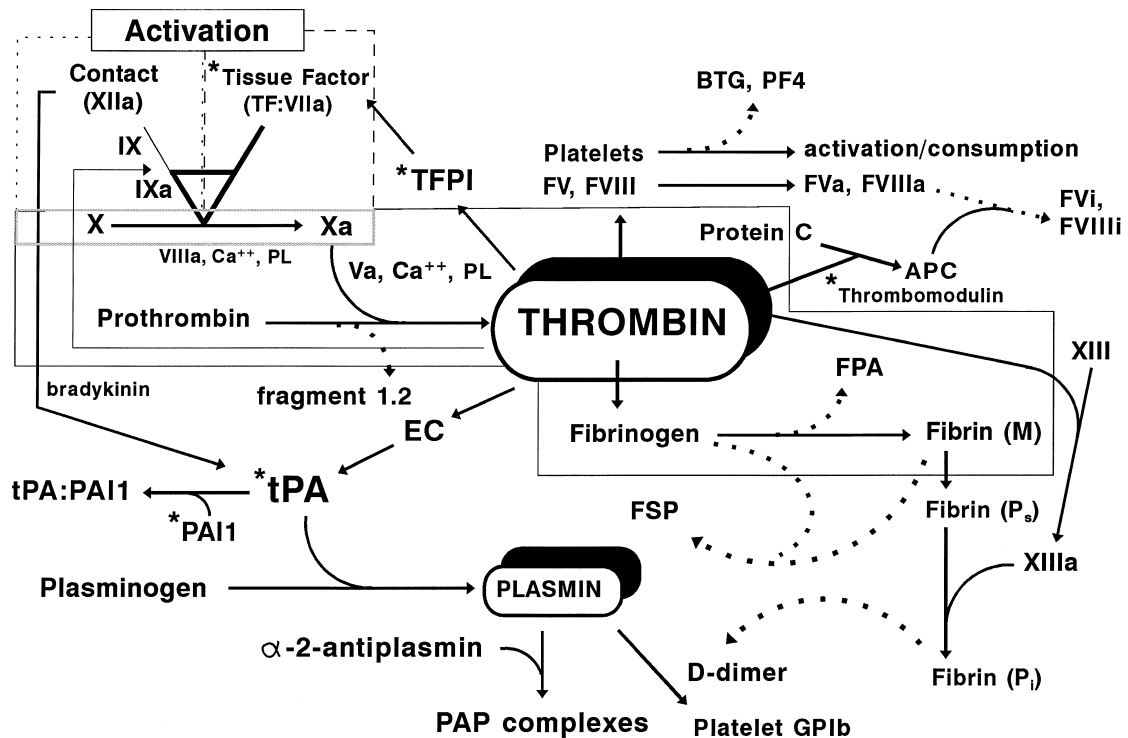

Fig. 1. Mechanisms and effects of excessive hemostatic activation with cardiac surgery. The coagulation system, a complex web of interactions, is subdivided into three pathways: intrinsic or contact (enclosed by a small dashed line), extrinsic or tissue factor (enclosed by a large dashed line), and common (enclosed by a solid line); the conversion of Factor X to Xa is within all three pathways (enclosed by a solid, thick line). Dashed lines designate release of protein cleavage by-products. Activated factors are designated using a small "a," whereas inactivated factors are designated using a small "i." XII = Factor XII; VII = Factor VII; X = Factor X; VIII = Factor VIII; IX = Factor IX; V = Factor V; XIII = Factor XIII; PT 1.2 = prothrombin fragment 1.2; Ca<sup>++</sup> = calcium ions; FPA = fibrinopeptide A; PL = phospholipid; PAP = plasmin-antiplasmin complexes; EC = endothelial cells; tPA:PAI1 = tPA-PAI1 complexes; fibrin (m) = fibrin monomer; fibrin (p) = fibrin polynomer; fibrin (L) = fibrin cross-linked polymer; PAI1 = plasminogen activator inhibitor; tPA = tissue plasminogen activator; FDP = fibrinogen-fibrin degradation products; D-dimers = polymerized fibrin degradation products. \*Designates endothelial cell related.

and coagulation (e.g., proteins C and S, ATIII, heparin cofactor II (HCII), and tissue factor pathway inhibitor) to form clot. The fibrinolytic system consists of several plasmatc factors (e.g., tissue plasminogen activator [tPA], plasminogen) that interact to produce plasmin, which lyses clots and potentially prevents vasocclusion at the site of vessel injury; the fibrinolytic system is regulated by other factors, such as plasminogen activator inhibitor and  $\alpha_1$  antiplasmin that bind tPA and plasmin, respectively.

Cardiac surgery with cardiopulmonary bypass (CPB) places patients at risk for excessive perioperative blood loss. This risk is influenced by the type of procedure<sup>1,2</sup> and the duration of CPB.<sup>3,4</sup> Although preexisting<sup>5</sup> or acquired<sup>6</sup> hemostatic abnormalities occasionally cause excessive perioperative bleeding, more often, CPB impairs the hemostatic system, which results in excessive bleeding (fig. 2). Crystalloid

or colloid solutions used to prime the CPB circuit and as a component of cardioplegia significantly dilute coagulation factors and platelets,<sup>2,7</sup> and excessive activation of the hemostatic system can also consume them. This activation results from stimulation of both the intrinsic<sup>8</sup> and the extrinsic<sup>9,10</sup> pathways from blood contact with extracorporeal and pericardial surfaces, as well as from the subatmospheric pressure of cardiectomy suction. Excessive fibrinolysis can be triggered by CPB-mediated activation of Factor XII, kallikrein<sup>11</sup> and thrombin, hypothermia,<sup>12</sup> retransfusion of tPA that has been released into the surgical field,<sup>13</sup> or intravascular release from injured endothelial cells.<sup>14</sup> Even after "complete" protamine neutralization, heparin can potentially inhibit coagulation<sup>15</sup> and platelet function.<sup>16,17</sup> Similarly, excess protamine can inhibit coagulation<sup>18</sup> and affect platelet function.<sup>19-21</sup> Finally, elastase release from polymorphonuclear leu-

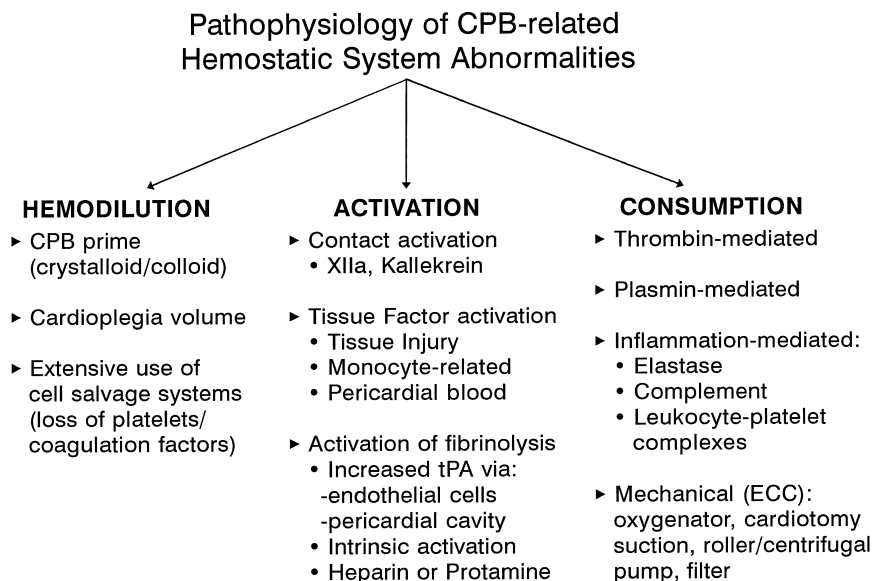

**Fig. 2. Pathophysiology of hemostasis abnormalities with extracorporeal circulation.** Cardiopulmonary bypass crystalloid prime refers to the crystalloid solution necessary to prime the cardiopulmonary bypass circuit, whereas cardioplegia volume refers to the volume of crystalloid necessary for cardioplegic myocardial arrest. Contact activation *via* extracorporeal circulation (ECC) refers to contact activation related to interface of blood with nonendothelial surface of the ECC. Pericardial activation refers to activation of the hemostatic system *via* the tissue factor pathway mediated by transfusion pericardial blood containing tissue thromboplastin. Mechanical ECC refers to shear forces imposed by some of the components of the ECC circuit as listed tPA = tissue plasminogen activator; Gp = platelet glycoprotein receptors (e.g., IIb/IIIa or Ib).

kocytes<sup>22</sup> and tumor necrosis factor<sup>23,24</sup> may impair hemostasis.

Increased thrombin and plasmin activity are important because they each mediate several reactions (fig. 1). In addition to generating fibrin monomer, thrombin activates Factors V, VIII, and XIII and platelets. At the same time, thrombin downregulates hemostasis by releasing tPA and tissue factor pathway inhibitor and by activating protein C, which, when complexed with endothelial-bound thrombomodulin, clears activated Factors V and VIII. Thrombin-mediated consumption of these factors was suggested recently by inverse relations between Factor V levels and markers of thrombin generation (e.g., prothrombin fragment 1.2:  $r = -0.57$ ) or activity (e.g., fibrinopeptide A:  $r = -0.53$ ) at the end of CPB.<sup>25</sup> Despite relatively high doses of heparin during CPB, thrombin and plasmin are generated progressively,<sup>9,26</sup> as shown by the increasing concentrations of prothrombin fragment 1.2 (F1.2), thrombin-antithrombin complexes, fibrin monomers,<sup>27</sup> and fibrin degradation products (e.g., D-dimers).<sup>25,28,29</sup> Excessive plasmin activity can lead to platelet dysfunction from fibrinogen-fibrin degradation products (FDP),<sup>16</sup> degradation of Factors V, VIII, and XIII,<sup>30</sup> and, rarely, hypofibrinogenemia.<sup>2,31-33</sup> Plasmin can also either lyse<sup>34</sup> or internalize<sup>35,36</sup> platelet membrane glycoproteins (GP Ib), impair the *in vitro* response of platelets to various agonists,<sup>37</sup> and enhance platelet response to thrombin at lower temperatures.<sup>35</sup>

The exact effects of hypothermia on the hemostatic system during CPB are not well-characterized. Better suppression of thrombin activity during hypothermia<sup>38</sup> by higher heparin concentrations may preserve coagulation factors and platelets even though platelet reactivity increases.<sup>39</sup> If thrombin activity decreases at hypother-

**Table 1. Summary of Hemostatic Abnormalities Associated with Cardiac Surgery Involving Extracorporeal Circulation**

|                                                                                                           |
|-----------------------------------------------------------------------------------------------------------|
| Decreased or denatured coagulation factors <sup>2,7,42,174,283-287</sup>                                  |
| Decreased physiologic inhibitors (ATIII, protein C, protein S) <sup>25,28,63-68,174,286,288-294</sup>     |
| Decreased fibrinolysis inhibitors (PAI1, $\alpha$ -2 antiplasmin) <sup>295,296</sup>                      |
| Disseminated intravascular coagulation <sup>297,298</sup>                                                 |
| Primary fibrinolysis <sup>299</sup>                                                                       |
| Platelet related                                                                                          |
| Thrombocytopenia <sup>2,11,286,294,300-302</sup>                                                          |
| Platelet activation/desensitization <sup>3,11,25,42,43,283,303-309</sup>                                  |
| Prolonged bleeding time <sup>3,157,283,284,301,310</sup>                                                  |
| Decreased platelet reactivity <sup>3,42,251,252,284,301,305,307,308,311,312</sup>                         |
| Loss of platelet glycoprotein receptors                                                                   |
| Fibrinogen (Gp IIb/IIIa) <sup>302-304,313,314</sup>                                                       |
| von Willebrand factor receptor (Gp Ib) <sup>303,304,314-316</sup>                                         |
| Platelet degranulation (BTG, PF4, ADP) <sup>3,22,25,32,42,43,67,145,157,229,304,305,308,312,317,318</sup> |
| Changes in platelet signaling/adhesion molecule expression <sup>19,304,305,311,318-322</sup>              |
| Hypothermia-related effects <sup>3,35,39,323-325</sup>                                                    |
| Heparin-related inhibition <sup>16,17,21,52,53,95,144,146-148,226</sup>                                   |
| Heparin-related activation <sup>17</sup>                                                                  |
| Protamine-related platelet dysfunction <sup>19-21,156,157</sup>                                           |

ATIII = antithrombin III; PAI1 = plasminogen activator inhibitor 1; Gp = glycoprotein; BTG =  $\beta$ -thromboglobulin; PF4 = platelet factor 4; ADP = adenosine diphosphate.

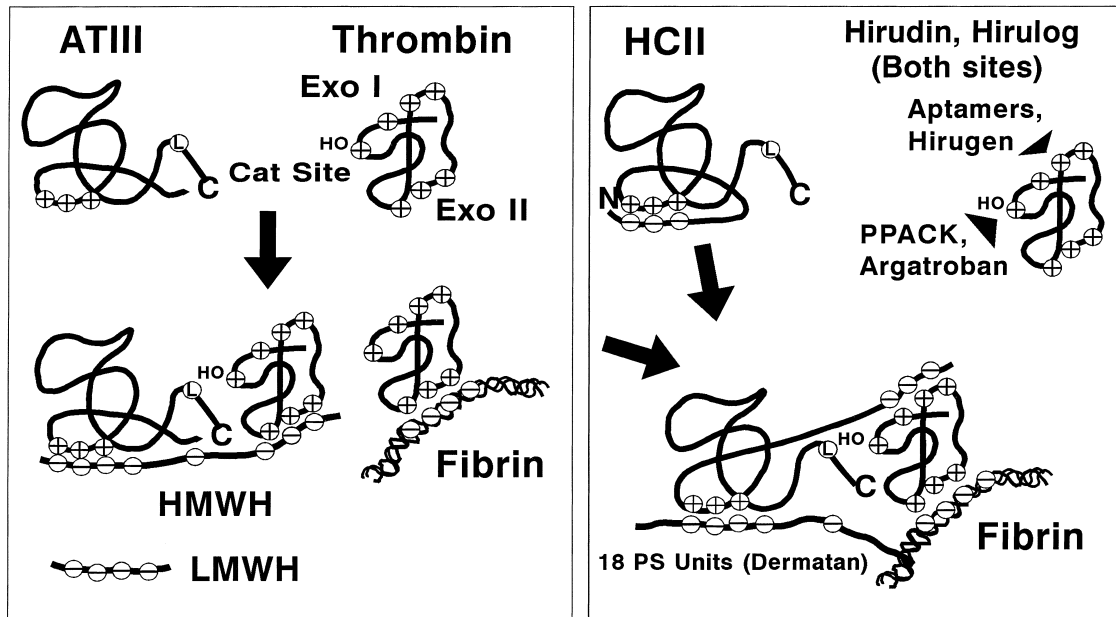

**Fig. 3.** Inhibition of thrombin activity. (*Left*) Depiction of normal physiologic inhibition of fluid-phase thrombin by high-molecular-weight (HMW) heparin molecules and the limitations of heparin in inhibiting clot-bound thrombin. The thrombin molecule has three major binding sites: (1) the fibrinogen binding site (Exo I), (2) the fibrinogen catalytic site (Cat Site), and (3) the fibrin binding site (Exo II). After binding of heparin to the antithrombin III (ATIII) molecule *via* a critical pentasaccharide sequence, a conformational change in the C-terminal portion of the ATIII molecule is induced. Inhibition of the thrombin molecule requires heparin molecules with a critical oligosaccharide chain length of 18 U that serve as a template for the binding of ATIII with thrombin. However, thrombin inhibition *via* the ATIII–heparin mechanism is limited by availability of the Exo II site, which can also be occupied by fibrin. Although low-molecular-weight (LMW) fractions of heparin induce a conformational change in the C-terminal portion of the ATIII molecule, they cannot serve as a template for ATIII and thrombin because of their short chain length. (*Right*) Depiction of the normal inhibition of clot-bound thrombin by the heparin cofactor II (HCII)—heparin complex and the sites of action of various direct thrombin inhibitors. A minimum chain length of 6 U for the heparin oligosaccharide is required to activate HCII; however, 20–24-U chain lengths result in a substantially greater thrombin inhibition *via* HCII. Direct thrombin inhibitors, such as hirudin and hirulog, bind to both the Exo I and the catalytic sites of the thrombin molecule. In contrast, polypeptide aptamers and hirugen bind to the Exo I site, whereas argatroban binds to the fibrinogen catalytic site of thrombin. As modified from Tollefson DM: Insight into the mechanism of action of heparin cofactor II. *Thromb Hemostas* 1995;74:1209–14. Reprinted with permission.

mia, like that of most enzymes, an *in vitro* monitoring system reflecting thrombin activity directly may better represent physiologic conditions.

In summary, activation of coagulation and fibrinolysis with consumption of platelets and labile coagulation factors can occur even with standard high-dose heparin-induced anticoagulation. Although several hemostatic aberrations have been reported after CPB (table 1), platelet dysfunction is considered to be the most important abnormality in the early postoperative period.<sup>3,5,40–43</sup>

### Overview of Heparin in Cardiac Surgery

Anticoagulation is used during cardiac surgery to prevent overt thrombosis of the extracorporeal circuit and to minimize excessive CPB-related activation of the hemostatic system. Heparin is used routinely because it is

effective, immediately reversible, generally well-tolerated, and inexpensive. Unfractionated heparin is a polysaccharide mixture of low- and high-molecular-weight fractions (*i.e.*, molecules ranging from 1,000–50,000 d) that differ functionally. Fractions with minimum chain length of 18 oligosaccharide units and a molecular weight of approximately 4,500 d or higher preferentially inhibit thrombin (*i.e.*, Factor IIa).<sup>44</sup> Oligosaccharide chain length is important because thrombin inhibition requires simultaneous binding of thrombin and ATIII by heparin, which acts as a template (fig. 3). A minimum chain length of 6 oligosaccharide units is essential for heparin to catalyze the inhibition of thrombin by HCII, another important *in vivo* inhibitor of the hemostatic system (fig. 3). However, inhibition (*e.g.*, 10,000-fold increase) of thrombin *via* HCII is optimal with a chain length of 20–24 oligosaccharide units.<sup>45</sup> The ability of



HCI to inhibit clot-bound thrombin may be important during CPB as well.<sup>46,47</sup>

Because inhibition of Factor Xa does not require simultaneous binding of Xa and ATIII *via* a heparin template, lower molecular weight fractions of unfractionated heparin easily inhibit Factor Xa. The antithrombotic properties of heparin are predominantly mediated by the binding of heparin to ATIII through a specific pentasaccharide sequence. This complex then inhibits Factor Xa (*i.e.*, all molecular weight fractions) and thrombin (*i.e.*, higher molecular weight fractions of unfractionated heparin).<sup>48</sup> Only one in three unfractionated heparin molecules has the critical pentasaccharide sequence necessary for binding to ATIII.<sup>48</sup> Although binding of heparin to ATIII inhibits thrombin and Factor Xa,<sup>49</sup> this complex also inhibits several other sites in the intrinsic pathway. In addition, the extrinsic pathway can be attenuated by heparin-mediated release of tissue factor pathway inhibitor<sup>50</sup> that inhibits activation of the extrinsic pathway.<sup>51</sup> Heparin may also inhibit<sup>16,17,52,53</sup> or activate<sup>17</sup> platelets and has been shown to initiate fibrinolysis.<sup>16</sup>

Although unfractionated heparin is metabolized in the reticuloendothelial system and in the liver, at least 50% is eliminated unchanged *via* the kidneys. Plasma elimination half-life of unfractionated heparin varies with dose, increasing from 60 min with 100 U/kg to 150 min with doses of 400 U/kg.<sup>54-56</sup> Low-molecular-weight heparin (LMWH) compounds, such as enoxaparin (Rhone-Poulenc Rorer, Collegeville, PA) or dalteparin (Pharmacia & Upjohn Co., Kalamazoo, MI) have a more consistent pharmacokinetic profile between patients because of the lower protein binding,<sup>57</sup> less affinity for platelets,<sup>52</sup> vWF<sup>52</sup> and endothelial cells,<sup>58</sup> and clearance, which is primarily renal.<sup>59</sup>

There is substantial variability of heparin anticoagulant responsiveness, as illustrated by a wide range of heparin dose-response test-derived slope values in patients undergoing cardiac surgery (median, 79; 95% confidence interval, 58-114 s · U<sup>-1</sup> · ml<sup>-1</sup>)<sup>60</sup> and in normal volunteers (median, 92; 95% confidence interval, 77-117 s · U<sup>-1</sup> · ml<sup>-1</sup>).<sup>61</sup> Impaired heparin responsiveness (*i.e.*, also called *heparin resistance*) often is attributed to ATIII deficiency.<sup>61</sup> ATIII activity levels as low as 40-50% of normal, which are similar to those observed in patients with heterozygotic hereditary deficiency,<sup>62</sup> are commonly seen during CPB.<sup>25,63-67</sup> Acquired perioperative reductions in plasma ATIII concentrations have been related to preoperative heparin use,<sup>65-68</sup> hemodilution,<sup>64-66</sup> or consumption during CPB.<sup>25</sup> The importance of ATIII in controlling platelet and coagulation

activation is supported by recent findings that large increases in markers of platelet activation (*e.g.*,  $\beta$  thromboglobulin and thrombin activity, such as fibrinopeptide A [FPA], occurred when ATIII concentration was < 0.6 U/ml (normal, 0.8-1.2 U/ml).<sup>61</sup> Significant variability in heparin anticoagulant response<sup>60,61</sup> may also result from interpatient differences in heparin binding to endothelial cells,<sup>58</sup> leukocytes,<sup>69</sup> platelets,<sup>70,71</sup> or proteins,<sup>15,49,72,73</sup> such as vitronectin,<sup>74</sup> vWF<sup>52</sup> or histidine-rich glycoprotein.<sup>57</sup> The heparin tissue source (*i.e.*, intestinal *vs.* lung, porcine *vs.* bovine), method of preparation, molecular weight distribution of heparin used,<sup>15,75</sup> and possibly the use of nitroglycerin infusions<sup>68,76</sup> (for which the mechanisms are unknown) may also contribute to impaired responsiveness. Unfortunately, no currently available tests can help clinicians identify the specific cause of heparin resistance.

## Current Monitoring methods

### *Monitoring Hemostasis during CPB: Current Practice and Fixed Dosing Regimens*

A survey in 1993 of anticoagulation practices (Appendix) indicates that heparin administration for CPB is predominantly based on an initial dose followed by activated clotting time (ACT) monitoring, although some centers still use fixed dosing schemes. The limitations of fixed dosage regimens without monitoring include the lack of confirmation of adequate anticoagulation and the inability to maintain a consistent heparin concentration for individual patients. However, one blinded study using fixed doses found no relation between ACT values during CPB and bleeding outcomes.<sup>77</sup> In addition, Jobes *et al.*<sup>78</sup> did not find reduced bleeding or transfusion requirements when heparin concentration monitoring was compared to fixed dosage protocols. As discussed later, inconsistent outcomes (*i.e.*, some showing improved transfusion outcomes, others not) have been observed when ACT monitoring was compared to fixed dosing regimens (table 2). Available point-of-care instruments can facilitate the monitoring of heparin's antithrombotic properties and its circulating concentration.

### *Monitoring Heparin's Anticoagulant Properties: Instruments that Measure ACT*

The ACT assay represents a modification of the Lee-White whole blood clotting time and uses an activator, either clay (kaolin) or diatomaceous earth (celite), to accelerate coagulation by activating the contact path-

## ANTICOAGULATION MONITORING DURING CARDIAC SURGERY

**Table 2. Summary of Studies That Have Examined the Effect of the Method of Anticoagulation Monitoring (Activated Clotting Time) versus No Monitoring on Perioperative Blood Loss and Transfusion Outcomes**

| Reference                                            | No. of Patients | Blood Loss | Transfusion Requirements | Study Design                       |
|------------------------------------------------------|-----------------|------------|--------------------------|------------------------------------|
| Babka <i>et al.</i> , 1977 <sup>134</sup>            | 20              | ACT < NM   | NE                       | Prospective, randomized            |
| Verska <i>et al.</i> , 1977 <sup>133</sup>           | 114             | ACT < NM   | ACT < NM                 | Historical control group           |
| Roth <i>et al.</i> , 1979 <sup>135</sup>             | 56              | ND         | ND                       | Historical control group           |
| Akl <i>et al.</i> , 1980 <sup>141</sup>              | 120             | ND         | ACT < NM                 | Historical control group           |
| Papaconstantinou <i>et al.</i> , 1981 <sup>136</sup> | 126             | ACT < NM   | ACT < NM                 | Historical control group           |
| Jumean <i>et al.</i> , 1983 <sup>137</sup>           | 77              | ACT < NM   | NE                       | Historical control group           |
| Dearing <i>et al.</i> , 1983 <sup>142</sup>          | 648             | ACT < NM   | ACT < NM                 | Retrospective, sequential grouping |
| Niinikowski <i>et al.</i> , 1984 <sup>138</sup>      | 100             | ACT < NM   | ND                       | Retrospective, sequential grouping |
| Lefemine <i>et al.</i> , 1985 <sup>139</sup>         | 61              | ND         | NE                       | Not specified                      |
| Preiss <i>et al.</i> , 1985 <sup>140</sup>           | 350             | ND         | ACT < NM                 | Retrospective                      |
| Metz <i>et al.</i> , 1990 <sup>77</sup>              | 193             | ND         | NE                       | Prospective                        |

Heparin doses were either administered based on activated clotting time values or empiric dosing regimens or no monitoring. Anticoagulation factors that help explain the discrepant results between studies are included.

ND = no difference, NE = not examined; ACT = activated clotting time; NM = no monitoring.

Reprinted with permission as modified from Gravlee GP: Anticoagulation for cardiopulmonary bypass, *Cardiopulmonary Bypass: Principles and Practice*. Edited by Gravlee GD, Utley RF. Baltimore, Williams & Wilkins, 1993, pp 340–80.

way. Test tubes or cartridges can be inserted into respective instruments for prewarming 1 min or more before test initiation because failure to prewarm prolongs ACT values.<sup>79</sup> Hemochron (International Technidyne Inc., Edison, NJ) automated instruments permit measurement of celite or kaolin ACT values. Blood (2.0 ml) either devoid of heparin or containing heparin up to 8 U/ml (higher levels prolong ACT values beyond the 1,000-s detection limit) is transferred into an ACT tube that contains either celite or kaolin (or less commonly, saline) and a magnetic rod. The blood is then mixed by a manual, gradual shaking of the tube. After the tube is inserted into a 37°C heat block chamber, it rotates automatically until a formed clot engages the rod, at which time a sensor detects a change in magnetic attraction and stops a timer to yield an ACT value. This value relates linearly to the concentration of heparin in the blood specimen.<sup>80</sup>

Hepcon or ACT II (Medtronic Blood Management, Parker, CO) automated instruments use kaolin or, less commonly, celite as the activator. Blood specimens (0.4 ml) are either automatically (Hepcon) or manually (ACT II) inserted in each of the two (ACT II or Hepcon) wells of a cartridge. Each instrument then lifts a plunger-flag assembly that facilitates mixing and activation of blood by kaolin or celite. The presence of a clot is based on optical detection of a decreased rate of descent of the plunger-flag assembly.

Activated clotting time can also be measured using the Sonoclot instrument (SonACT, Sienco Corp., Wheat Ridge, CO), which detects viscoelastic changes of blood as it

undergoes coagulation. Whole blood or platelet-rich plasma obtained *via* differential centrifugation (0.4 ml) is placed in a cuvette in which a vibrating plastic probe is suspended. The changes in mechanical impedance to vibration exerted on the probe are recorded in a tracing called a Sonoclot signature. As fibrin strands form, impedance increases to a peak. The onset time (T1, normally 80–130 s) reflects the beginning of a fibrin (clot) formation and corresponds to the ACT (*i.e.*, called SonACT). Although the SonACT potentially may be used to monitor anticoagulation, evaluations of this test during CPB are lacking.

One recently developed ACT test (Array Medical, Edison, NJ) uses either celite or kaolin activation and 2-ml blood sample volumes. However, insufficient data are available to comment on its performance.

Celite ACT and kaolin ACT correlate well ( $r = 0.91$ ,  $r = 0.93$ , respectively) with laboratory-derived anti-Factor Xa heparin concentration values in the pre-CPB period<sup>81</sup> and are commonly used during CPB to monitor anticoagulation. However, ACT prolongation during CPB is not necessarily caused by heparin.<sup>78</sup> This may relate to the intrinsic variability of ACT measurements,<sup>82,83</sup> to other factors associated with CPB, such as hypothermia,<sup>81,82,84</sup> quantitative and qualitative platelet abnormalities,<sup>85–87</sup> aprotinin (*i.e.*, when celite is used as an activator),<sup>88–92</sup> or hemodilution.<sup>81</sup> An inverse, independent relation between core body temperature and ACT values (*i.e.*, using multivariate statistical analyses) observed in one study may reflect inadequacy of specimen warming by the respective instruments.<sup>81</sup> What remains unclear is the degree to which this divergence (*i.e.*,

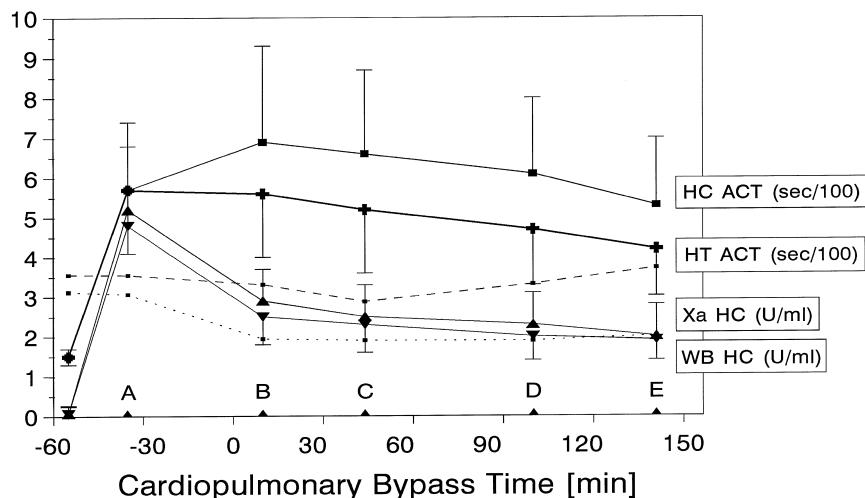

Fig. 4. Limitations of activated clotting time (ACT) in heparin monitoring with cardiopulmonary bypass (CPB). Comparison of ACT values obtained with two different contact-activating agents and heparin concentration measurements using a laboratory-based and point-of-care method obtained in 32 patients during CPB. Mean values of ACT are expressed as seconds per 100 (s/100) for both celite Hemochron (HC) ACT and kaolin Hemo-tec (HT) ACT assays. Plasma equivalent heparin concentration (WB HC) and anti-Xa plasma heparin concentration (anti-Xa HC) are expressed as units per milliliter (U/ml). Hematocrit values (dotted line) are expressed as percent values divided by 10, and core body temperature (dashed line) is expressed as degrees centigrade divided by 10. Blood specimens were obtained before heparin administration and 10 min after (A) heparin ad-

ministration, (B) initiation of CPB, (C) achievement of hypothermia, and (D) rewarming, as well as (E) immediately before discontinuation of CPB. T-bars represent SD. From Despotis GJ, Summerfield AL, Joist JH, Goodnough LT, Santoro SA, Spitznagel E, Cox JL, Lappas DG: Comparison of activated coagulation time and whole blood heparin measurements to laboratory plasma anti-Xa heparin concentration in patients having cardiac operations. *J Thorac Cardiovasc Surg* 1994; 108:1076–82. Reprinted with permission.

between ACT and heparin concentration values) reflects an increased sensitivity of coagulation proteins to heparin-induced anticoagulation in the presence of hypothermia. Unfortunately, no investigation has specifically assessed the relation between ACT and blood-heparin concentrations at various constant levels of hypothermia.

By affecting the ACT method, CPB-related factors (*i.e.*, hemodilution and hypothermia) ultimately may contribute to variability in heparin levels during CPB when this test is used to guide heparin therapy.<sup>77,81,84,93</sup> Variability in heparin concentration was recently assessed by calculating the absolute deviation of heparin levels during CPB from the target pre-CPB heparin levels (*i.e.*, obtained after heparin administration but before initiation of CPB) for each of 32 patients.<sup>81</sup> When heparin dosing was guided by ACT values (*i.e.*, < 480 s for additional heparin) during CPB, heparin concentration (*i.e.*, anti-Xa activity) varied substantially (2.7 U/ml = mean absolute deviation for 32 patients) from those concentration values that were present at similar ACT values before CPB.<sup>81</sup> In most cases, the CPB heparin concentrations were lower than those observed before initiation of CPB. Mean absolute deviation was smaller (0.75 U/ml,  $P < 0.001$ ) when heparin was infused continuously in another study.<sup>94</sup> Figure 4 shows the typical divergence between mean ACT and heparin concentration (*i.e.*, both anti-Xa heparin activity and whole blood heparin concentration) values that occurs during hypothermic CPB.<sup>81</sup>

#### Heparin Concentration Assays

**Automated Protamine Titration Method and Fluorometric Assay.** To provide an ACT alternative that is potentially unaffected by CPB-related hypothermia and hemodilution, several methods have been developed to measure whole blood heparin concentration. These techniques use either neutralization techniques (*e.g.*, automated protamine titration method, heparin-responsive sensor) or heparin activity (*e.g.*, fluorometric assay, Hep-Test [Haemachem, St. Louis, MO] whole blood anti-Xa/IIa activity). All of these techniques offer the advantage over ACT-based or empiric protamine dosing regimens of basing protamine doses on whole blood heparin concentrations present at the end of CPB. However, each one is limited by the need to use standard algorithms to calculate blood volume in a patient population in which blood volume is likely to be highly variable. Other limitations include discontinuous measurements and the use of clotting as a surrogate endpoint rather than direct measurement of heparin concentrations. Alternatively, basing protamine on administered heparin doses or ACT-based estimates of heparin concentration may result in administration of larger protamine doses. The inability of assays that measure only heparin concentration to detect the antithrombotic properties of heparin constitutes a major limitation of this approach. This is important in patients who have a theoretically adequate blood heparin concentration but who also have an increased risk for thrombosis because of resistance to heparin-induced an-

ticoagulation. Accordingly, because heparin concentration monitoring only assesses the amount or concentration of heparin that do not necessarily correlate with the anticoagulant effects of heparin, it may mislead the clinician regarding anticoagulant activity. The optimal monitoring system would therefore accurately assess *in vivo* thrombin activity, yet not be artifactually affected by the effects of hemodilution or hypothermia unless these factors directly affect *in vivo* thrombin activity.

Whole blood heparin concentration measurements can be performed at the bedside using an automated heparin protamine titration method (Hepcon Instrument, Medtronic Blood Management, Parker, CO).<sup>38,78,95,96</sup> With this method, a thromboplastin reagent is used to accelerate coagulation *via* the tissue factor pathway, and the device then measures clotting times in several channels that contain varying amounts of protamine. The principle behind this test is that clotting occurs first in the chamber in which the protamine-to-heparin ratio is nearest the neutralization point.<sup>78</sup> Because the first channel to clot, and not absolute clot time, is the endpoint, this method is unaffected by reductions in clotting factors and platelets during CPB.<sup>97-99</sup>

Heparin levels determined by this automated protamine titration method have been shown to correlate well with anti-Xa plasma heparin measurements (*i.e.*, a laboratory-based method)<sup>81,99</sup> even when aprotinin is present.<sup>100</sup> Hardy *et al.* found a large bias (mean  $\pm$  SD difference between values was  $1.45 \pm 1.65$  U/ml) between measurements derived from the automated protamine titration method and from anti-Xa measurements.<sup>101</sup> However, the findings of Hardy *et al.*<sup>101</sup> were not confirmed in two subsequent studies<sup>98,99</sup> in which the bias between Hepcon and anti-Xa levels was lower,  $0.002 \pm 0.53$  (range,  $-1.78$ – $1.72$ ) and  $0.715 \pm 0.99$  U/ml, respectively. Although the exact relation between whole blood (automated protamine titration assay) and plasma (anti-Xa chromogenic) heparin levels needs further investigation, another recent study showed that patient-specific heparin concentrations can be maintained using the automated protamine titration assay.<sup>94</sup>

The Protopath (Dade division, American Hospital Supply Inc., Chicago, IL) system measures heparin activity by its ability to inhibit the action of thrombin on a synthetic fluorogenic substrate.<sup>102,103</sup> A plasma separator produces 0.5 ml plasma in 1 min by pneumatic filtration rather than centrifugation. The Protopath system assay is not influenced by fibrinogen or other procoagulant levels, by decreases in ATIII, or by hypothermia,<sup>93</sup> all of which can affect the ACT method. This assay appears to be sensitive solely to the concentration of

heparin in the plasma. As a result, ATIII deficiency or other causes of heparin resistance will not be detected. Heparin levels can be measured accurately in approximately 5 min, so that additional doses of heparin can be given or withheld appropriately. In one study during CPB, Protopath use decreased protamine doses by an average of 64.7% without causing clotting or bleeding problems.<sup>103</sup> Although the Protopath system provides accurate plasma heparin concentration measurements,<sup>104</sup> its clinical usefulness is limited by the lack of clot-formation detection, the need for considerable technical expertise in assay standardization, the need to convert plasma heparin concentration values to whole blood equivalent values when determining protamine dose, and by equipment calibration and maintenance requirements. These limitations may account for the lack of its widespread use. Limitations common to both methods (*i.e.*, automated protamine titration and Protopath) include the inability of measurements to assess actual molecular species (*e.g.*, high-molecular-weight heparin *vs.* LMWH), to evaluate the anticoagulant properties of heparin or to detect heparin resistance.

## Newly Developed Monitoring Techniques

### *Monitoring Heparin's Anticoagulant Properties: HMT, LHMT, HiTT, HiPT*

The thrombolytic assessment system (TAS; Cardiovascular Diagnostics, Raleigh, NC) is a portable, lightweight instrument initially designed for bedside monitoring of prothrombin time (PT) and activated partial thromboplastin time (aPTT). The TAS rapidly performs measurements on citrated whole blood or plasma. Disposable test cards, the size of a credit card, contain a reaction chamber with all the reagents necessary for a particular test. These cards detect the onset of clot formation or lysis in an analyzer maintained at 37°C. The reagents are dry, which extends room temperature shelf life. Test cards also contain celite, calcium chloride, modifiers-stabilizers, and paramagnetic iron oxide particles. The heparin management test (HMT) and low-range heparin management test (LHMT) are used to monitor the anticoagulant properties of heparin in whole blood with heparin concentrations between 1 and 10 U/ml or between 0 and 4 U/ml, respectively. When 30  $\mu$ l blood is added to the reaction chamber on the test card, it mixes with the reagent in a reaction chamber, thereby dissolving the dry reagent and changing the light reflection pattern detected by a photodetector to automatically



begin the test. With the HMT and low-range heparin management tests, celite activates coagulation. Coagulation is measured by optically monitoring the impedance of the movement of the iron oxide particles in an oscillating magnetic field. Clotting causes particle movement to cease, whereas clot lysis causes them to resume movement. HMT measurement values should be affected by *in vitro* hypothermia based on the equilibration of the relatively small volume of blood (30  $\mu$ l) used in the test and the room temperature reagents within the non-heated chamber in the TAS system, which ultimately lowers the temperature of the blood specimen. Preliminary evidence suggests that correlations between HMT and heparin concentration values are slightly better than Hemochron and ACT II versions of the test,<sup>105,106</sup> Gibbs *et al.*<sup>106</sup> demonstrated that the coefficient of variation was less for HMT values (7.3–14.2%) when compared to celite ACT (10.2–37.8%), and Slaughter *et al.* demonstrated a better correlation ( $P < 0.05$ ) between HMT values and anti-Xa values ( $r = 0.84$ ) when compared to kaolin ACT values ( $r = 0.75$ ).<sup>105</sup>

Another assay for monitoring heparin's anticoagulant properties during CPB is the high-dose thrombin time (HiTT; International Technidyne) that can be measured using Hemochron instruments. The HiTT assay measures heparin-antithrombin activity indirectly by using the final common pathway of the coagulation cascade. Because fibrin is formed when thrombin enzymatically cleaves fibrinogen in this test, the rate of fibrin formation relates to the concentration and qualitative function of fibrinogen and thrombin activity. In addition to the concentration of thrombin, the presence of thrombin inhibitors (e.g., heparin) or fibrin-split products influences HiTT measurements. Because fibrinogen levels more than 80 mg/dl generally do not affect the rate of fibrin formation and the HiTT assay contains a high concentration of thrombin (3 U/ml), fibrin formation (clot detection) should relate linearly to heparin concentration. Although this assay may have clinical usefulness for monitoring anticoagulation during CPB, in part because it is unaffected by aprotinin,<sup>107</sup> recent evidence indicates that HiTT values have a poor relation to whole blood heparin concentrations (Hepcon automated protamine titration method) before and during CPB.<sup>91</sup> Another limitation of this assay includes the instability of dissolved thrombin, necessitating fresh preparation of reagents. More extensive validation in controlled clinical studies is needed to compare HiTT values to ACT and heparin concentration values and to sensitive markers of coagulation activation during CPB.

Another assay that can be performed using a Hemochron instrument is the high-dose prothrombin time (HiPT), which evaluates activation *via* the extrinsic pathway. This whole blood measurement is activated by rabbit brain thromboplastin. A stepwise HiPT response to incremental heparin concentrations was recently demonstrated by Tabuchi *et al.*,<sup>108</sup> but more evaluations are needed to adequately evaluate this assay's relation to heparin concentration values (anti-Xa chromogenic assay), markers of hemostatic activation (e.g., FPA or fibrin monomer levels), and clinical usefulness.

Although assays developed as alternatives to the ACT-based tests potentially offer distinct advantages, inability to specifically assess suppression of thrombin activity as an endpoint is common to all of the tests described. As previously addressed, two important goals of anticoagulation monitoring during cardiac surgery are to prevent thrombosis of the extracorporeal circuit and to minimize excessive CPB-related activation of the hemostatic system. Therefore, an ideal method would directly assess the antithrombotic properties of heparin using a thrombin activity (e.g., fibrinopeptide A) or fibrin generation endpoint. Measurement values from such a system would ideally be affected only by other CPB-related factors, such as hypothermia, hemodilution, or aprotinin if these variables affected *in vivo* thrombin activity.

#### Heparin Concentration Assays

**Heparin-responsive Sensor, Whole Blood Anti-Xa/IIa Heparin Activity.** The heparin-responsive sensor (HRS), which consists of a heparin-sensitive membrane (critical components of membrane from Fluka Chemical Corp., Ronkonkoma, NY), measures heparin concentration by a potentiometric signal generated by the heparin molecule's negative charge. A polymer membrane-type ion-selective electrode detects a change in electrical potential induced by a quantitative titration of protamine.<sup>109–111</sup> If protamine added in a blood sample does not completely neutralize the heparin present, the electrical potential changes in proportion to the amount of excess heparin present. If protamine effectively neutralizes heparin, no potential change will occur. The HRS method correlates well with the Hepcon method ( $r = 0.942$ ) and has only a small bias (0.211 IU/ml).<sup>98</sup> The bias between the HRS and anti-Xa assays is also small (0.102 IU/ml) when compared to the bias between plasma-equivalent Hepcon values and anti-Xa assays (0.715 IU/ml).<sup>98</sup> Potential advantages of the HRS system over the Hepcon system include the absence of a need for clot formation (*i.e.*, assay is accurate in solutions that contain

no coagulation factors) and the ability to report heparin concentrations over a wider range of values. HRS has not yet been tested in a large number of patients and has the theoretical limitations of influence by other anions, such as salicylates, iodide, bromide, or nitrate, as well as cost.

The HepTest, a recently developed commercial clotting test, monitors the anticoagulant properties of unfractionated and LMWH based on the inhibition of either Factor Xa or IIa.<sup>112,113</sup> This method measures heparin's potentiation of ATIII-mediated inhibition of exogenous Factors Xa or IIa using an electrochemical clot detection endpoint.

Early studies showed that calculated values for LMWH pharmacokinetic parameters were similar using HepTest and either anti-Xa chromogenic or amidolytic assays.<sup>113,114</sup> Although another study showed that HepTest-measured Xa-like activity levels using finger-stick specimens were comparable to those measured with a chromogenic substrate assay using venous blood specimens,<sup>115</sup> a subsequent study from the same investigators showed that HepTest values were 10–20% larger than those from the chromogenic (*i.e.*, S 222) method.<sup>116</sup> Data from more recent studies indicate that HepTest measurements accurately reflect anti-Xa with LMWH and anti-Xa and anti-IIa activity with unfractionated heparin.<sup>117</sup> HepTest measurements have also been shown to reflect the anticoagulant tissue pathway factor inhibitor properties of tissue pathway factor inhibitor released by heparin.<sup>118</sup> This test also has been recently evaluated for potential use as a point-of-care method<sup>119</sup> and has been adapted for use with a fully automated, coagulation-dedicated analyzer.<sup>120</sup> Studies that evaluate the potential usefulness of this assay in monitoring anticoagulation during cardiac surgery are needed. Because this method assesses heparin concentration using a heparin activity endpoint, measurements could potentially vary, independent of molecular weight (*i.e.*, anti-Xa *vs.* anti-IIa activity). This limitation may be potentially overcome by assessing the differential inhibition of two important substrates (*e.g.*, thrombin and Factor Xa).

#### *Monitors that Predict Heparin Resistance*

If heparin resistance is secondary to ATIII deficiency, detection and treatment of heparin resistance is potentially important to the preservation of coagulation factors and platelets during CPB. Hereditary or acquired ATIII deficiency renders heparin less effective in suppressing thrombin generation or activity during extracorporeal circulation.<sup>64,66,121</sup> Because of this and the well-documented substantial interpatient variability in

the ACT response to heparin,<sup>60,61,122,123</sup> Bull *et al.*<sup>124</sup> advocate a dose-response plot to predict the heparin requirements of individual patients.

Accordingly, assays such as the heparin dose-response test (HDR; Medtronic Blood Management, Parker, CO) based on the kaolin ACT, and the Heparin Response Test (HRT; International Technidyne Inc.), based on the celite ACT, have been developed. These automated or semiautomated tests add heparin to the patient's blood *ex vivo* to determine ACT responsiveness to heparin. In addition to estimating heparin requirements for individual patients before surgery, these tests should be able to identify patients with significant heparin resistance secondary to decreased ATIII levels. Although a targeted ACT of 480 s was achieved from the initial heparin dose predicted by the HDR test in 40 of 41 adult patients,<sup>122</sup> further studies are needed to validate this test's ability to project the heparin dose needed to achieve any target ACT.

Potential use of these tests to identify patients with ATIII-mediated heparin resistance is supported by the demonstration of a progressive reduction in the responsiveness of whole blood to heparin (*i.e.*, at high concentrations used with CPB) when ATIII concentration is < 80 U/dL.<sup>61</sup> In this study,<sup>61</sup> there was a strong linear relation between kaolin (slope =  $1.04\text{ATIII} - 2$ ;  $r^2 = 0.78$ ) and celite (slope =  $1.36\text{ATIII} + 6$ ;  $r^2 = 0.77$ ) ACT slopes and AT III concentrations < 80 U/dl. These tests were used as part of anticoagulation management protocols in two recent studies showing that precise patient-specific control of heparin and protamine administration decreased blood loss (15 and 50%, respectively) and transfusion requirements (50 and 80%, respectively).<sup>60,125</sup> The protamine response and HRT tests were used in these studies to determine the heparin dose necessary to attain the target ACT value (*e.g.*, 400 or 480 s, respectively) before CPB. In the study by Despotis *et al.*,<sup>60</sup> the heparin concentration required to reach that target ACT value was maintained throughout CPB even if ACT values exceeded the target values.

#### *Monitoring Heparin after Cardiopulmonary Bypass: Detection of Residual Heparin or Heparin Rebound*

Persistent circulating heparin from inadequate neutralization<sup>126,127</sup> or release of heparin from heparin-binding proteins, from heparin-protamine complexes, or from other sites<sup>49,128</sup> can contribute to excessive bleeding after CPB. *Heparin rebound* is defined as the recurrence of heparin activity after complete neutralization by pro-

tamine. One study revealed that chest tube drainage is reduced if heparin rebound is detected using ACT values then treated with additional protamine.<sup>95</sup> The 1993 survey detailed in the Appendix also reveals that most centers were using ACT measurements as an index of adequate heparin reversal. However, the ACT is probably not the most appropriate test for diagnosing heparin rebound because it is relatively insensitive to heparin concentrations  $< 0.6$  U/ml.<sup>80,129</sup> Murray *et al.*<sup>129</sup> showed that Hepcon whole blood heparin concentration measurements detected heparin rebound better than the ACT, even though, at the time of the study, the Hepcon cartridge detection threshold was 0.4 U/ml. Because a cartridge (TheraCon, Medtronic HemoTec, Parker, CO) with a detection threshold of 0.1 U/ml is now commercially available, presumably this would further enhance the Hepcon device's diagnostic sensitivity advantage over ACT values in this application.<sup>130</sup> The heparin responsive sensor or the HepTest can also be used to detect low circulating levels of heparin after protamine administration.

Alternatively, heparinase (IBEX Corp., Montreal, CA), an enzyme that degrades heparin to smaller, inactive fragments, has been used to improve the sensitivity of various test systems to low heparin concentrations. Specifically, heparinase has been used with the ACT,<sup>131</sup> laboratory-based and point-of-care whole blood<sup>132</sup> PT and aPTT assays (Boehringer Mannheim Diagnostics, Indianapolis, IN) by comparing neutralized and un-neutralized specimens. In the heparinase ACT method, heparinase is included in one of the cartridge channels of a dual-channel high-range ACT (HR ACT) test to eliminate the anticoagulant properties of heparin. In addition, a whole blood thrombin time assay with protamine neutralization (HNTT, International Technidyne) has been evaluated for its ability to assess residual heparin or heparin rebound in the post-CPB period.<sup>125</sup> Although these tests may be clinically useful with respect to detection of un-neutralized heparin or heparin rebound, studies are needed to compare these assays to standard laboratory measurements of heparin activity and to define the heparin detection threshold.

## Impact of Monitoring on Clinical Practice

### *Impact on Blood Loss and Transfusion of Blood and Blood Components*

Our survey reveals that the ACT is the most commonly used method to monitor heparin anticoagulation during

CPB (Appendix). This finding probably relates to the ease of use of the ACT and studies from the late 1970s and early 1980s showing a reduction in postoperative chest tube drainage when the ACT test was used. When compared to no monitoring, the impact of heparin-protamine dosing guided by ACT-based protocols on chest tube drainage and transfusion outcomes has varied (table 2).<sup>77,133-142</sup> Of 11 studies, 6 showed a reduction in chest tube drainage and 5 showed no difference. Only seven of the studies investigated transfusion outcomes, and five of these showed that ACT-based protocols reduced transfusion requirements. Only 2 of these 11 studies were prospective,<sup>77,134</sup> and neither of these 2 involved a randomized, blinded study design, which may limit the accuracy and reliability of the findings.

Likewise, when compared to either fixed-dose<sup>78</sup> or ACT<sup>38,60,95,143</sup> protocols, the impact of heparin concentration monitoring protocols on bleeding and blood conservation has varied. Although some authors suggest that excessive bleeding relates to use of larger doses (*i.e.*, doses greater than those typically administered using ACT methods) of bovine heparin during CPB,<sup>38,144</sup> other studies found no differences in blood loss when either bovine<sup>95,145</sup> or porcine heparin were used.<sup>4,60,125,143</sup> Table 3 summarizes important factors that help explain the differences in outcomes using several heparin monitoring protocols. To determine whether heparin dose, as directed by an ACT-based protocol, relates to either blood loss or transfusion requirements, a multivariate analysis of 487 consecutive patients was recently performed.<sup>4</sup> Although this analysis was limited by its retrospective design, significant associations were demonstrated between lower initial-total heparin dosage and increased blood loss and transfusion requirements.

In a subsequent prospective randomized trial from the same institution, the impact of heparin and protamine administration as directed by a point-of-care whole blood (WB) hemostasis system (Hepcon, Medtronic Blood Management, Englewood, CO) on bleeding and blood transfusion when compared to an ACT-based protocol was evaluated in 254 patients.<sup>60</sup> An empiric dosing regimen for heparin and protamine was used for control patients using ACT values, whereas the anticoagulation-reversal protocol for intervention patients was based on HDR, ACT, and whole blood heparin concentration values. A patient-specific, reference heparin concentration (*i.e.*, pre-CPB whole blood heparin concentration associated with kaolin ACT of 480 s; median, 3.4 U/ml; 95% confidence interval, 2-5.4 U/ml) was maintained during CPB, and the protamine dose was calculated from the mea-

## ANTICOAGULATION MONITORING DURING CARDIAC SURGERY

**Table 3. Summary of Studies That Have Examined the Effect of Higher Heparin Doses and Method of Anticoagulation Monitoring on Perioperative Blood Loss and Transfusion Outcomes**

| Heparin Protocols Used                       | No. of Patients | Heparin Dose (U/kg) | Heparin Source (Bovine vs. Porcine)* | Patient-specific Monitoring | Heparin Rebound Monitoring | CPB Time (min) | Transfusion Requirements | Blood Loss (ml of CTD in 24 h) |
|----------------------------------------------|-----------------|---------------------|--------------------------------------|-----------------------------|----------------------------|----------------|--------------------------|--------------------------------|
| Heparin concentration vs. fixed dose         |                 |                     |                                      |                             |                            |                |                          |                                |
| Jobes <i>et al.</i> , 1981 <sup>78</sup>     | 46              | 318 vs. 307         | ?                                    | ?                           | No                         | ?              | NE                       | 1,057 vs. 953                  |
| High vs. low fixed heparin dose              |                 |                     |                                      |                             |                            |                |                          |                                |
| Boldt <i>et al.</i> , 1994 <sup>144</sup>    | 60              | 640 vs. 354         | Bovine                               | No                          | No                         | 107            | ↑                        | 1,150 vs. 700†                 |
| Okita <i>et al.</i> , 1997 <sup>145</sup>    | 94              | 440 vs. 286         | ?                                    | No                          | No                         | 168            | ND                       | 907 vs. 1,126                  |
| Heparin Concentration vs. ACT                |                 |                     |                                      |                             |                            |                |                          |                                |
| Gravlee <i>et al.</i> , 1990 <sup>38</sup>   | 21              | 564 vs. 442         | Bovine                               | No/yes                      | No                         | 105            | NE                       | 1,104 vs. 699†                 |
| Gravlee <i>et al.</i> , 1992 <sup>95</sup>   | 63              | 740 vs. 354         | Bovine                               | No/yes                      | Yes                        | 115            | ND                       | 1,035 vs. 901                  |
| Despotis <i>et al.</i> , 1995 <sup>60</sup>  | 254             | 612 vs. 462         | Porcine                              | Yes/yes                     | Yes                        | 145            | ↓                        | 840 vs. 924†                   |
| Sakurada <i>et al.</i> , 1997 <sup>143</sup> | 34              | 690 vs. 300         | ?                                    | Yes/yes                     | No                         | 71             | ND                       | 563 vs. 595                    |

Generally, studies implementing protocols that direct higher doses of heparin to be administered are summarized on the left side of each column; these included protocols in which heparin was administered based on either heparin concentration monitoring or empirically with time-dependent, heparin bolus/infusion techniques (high fixed heparin dose). Studies that implemented protocols that directed lower doses of heparin to be administered are summarized on the right side of each column; these included protocols in which heparin was administered empirically based on time-dependent, bolus/infusion regimens (low fixed heparin dose) or ACT monitoring. Anticoagulation factors that help explain the discrepant results between studies are included. Patient-specific dosing of heparin based on monitoring of either ACT values (anticoagulant response) or heparin concentration vs. empiric regimens are summarized for each study. Numeric values in this table represent mean values for each group.

CPB = cardiopulmonary bypass; NA = not applicable; NE = not examined; ND = no difference; CTD = chest tube drainage; ? = inability to discern from study; ACT = activated clotting time.

\* Bovine lung source vs. porcine mucosal source.

†  $P \leq 0.05$ .

sured, residual heparin concentration. Patients in the intervention cohort received 25% larger total doses of heparin and had smaller protamine-to-heparin ratios (*i.e.*, by 25%) when compared to control patients. A greater percentage of patients in the control cohort required platelet (34 *vs.* 22%,  $P = 0.03$ ), plasma (31 *vs.* 11%,  $P < 0.001$ ) and cryoprecipitate (5 *vs.* 0%,  $P = 0.01$ ) units when compared to the intervention cohort. Control cohort patients also had 10% longer operative post-CPB closure times ( $P = 0.02$ ), 15% more mediastinal chest tube drainage ( $P = 0.05$ ) in the first 4 h postoperatively, and twice as many control patients required hemostatic (*e.g.*, platelets, fresh frozen plasma, and so on) transfusion (17% *vs.* 33%,  $P = 0.005$ ).

Because generation of FPA<sup>38,64</sup> and inhibition of clot-bound thrombin<sup>47</sup> have been shown to relate inversely to heparin concentration, maintenance of heparin concentrations that more effectively inactivate thrombin may preserve hemostasis during prolonged CPB. This is supported by findings from two additional studies. The first study evaluated 31 patients requiring repeat or combined cardiac procedures (*i.e.*, coronary revascularization plus valve repair/replacement) and thus at increased risk for excessive bleeding.<sup>25</sup> Maintenance of higher heparin concentrations better preserved consumable ATIII

and Factors I, V, and VIII most likely related to better suppression of thrombin (65% reduction in FPA levels) and fibrinolytic (*i.e.*, 50% reduction in D-dimers) activity. The second study showed that larger heparin doses can better suppress thrombin (*i.e.*, lower TAT complexes) and fibrinolytic activity (*i.e.*, lower D-dimers) in patients undergoing deep hypothermic circulatory arrest.<sup>145</sup> These studies suggest the superiority of higher heparin concentrations for procedures involving prolonged or complicated CPB. These findings may relate to the propensity of hemodilution and hypothermia to prolong ACT, independent of blood heparin concentration, thus resulting in smaller heparin doses.

Higher stable heparin concentrations during CPB can also preserve platelet function during prolonged CPB. In a recent trial, less platelet activation (*i.e.*, lower platelet factor 4 and  $\beta$  thromboglobulin levels) was shown in patients who received larger heparin doses.<sup>145</sup> Preservation of platelets by higher heparin levels during CPB is supported by more prolonged bleeding times in patients who received less heparin during CPB;<sup>25</sup> in addition, a significant correlation ( $r = 0.51$ ,  $P = 0.004$ ) between FPA and BTG levels in that study suggests that platelet activation may relate directly to thrombin activity. Inhibition of platelet function by hepa-



**Table 4. Summary of Studies that Have Examined the Effect of Protamine Dose on Perioperative Blood Loss and Transfusion Outcomes**

| Reference                                           | No. of Patients | Blood Loss | Transfusion Requirements | Protamine:Heparin Ratio* |       |              |
|-----------------------------------------------------|-----------------|------------|--------------------------|--------------------------|-------|--------------|
|                                                     |                 |            |                          | MON                      | EMP   | % Reduction† |
| Berger <i>et al.</i> , 1968 <sup>149</sup>          | 64              | MON < EMP  | NE                       | 0.7:1                    | 1.4:1 | 43           |
| Guffin <i>et al.</i> , 1976 <sup>150</sup>          | 60              | MON < EMP  | NE                       | 0.4:1                    | 1.2:1 | 67           |
| Moriau <i>et al.</i> , 1977 <sup>151</sup>          | 20              | NE         | MON < EMP                | 1.1:1                    | 2.5:1 | 56           |
| Jobes <i>et al.</i> , 1980 <sup>78</sup>            | 46              | ND         | NE                       | 1.1:1                    | 1.7:1 | 35           |
| Ottesen <i>et al.</i> , 1984 <sup>152</sup>         | 20              | ND         | NE                       | 1.0:1                    | 1.6:1 | 38           |
| Keeler <i>et al.</i> , 1991 <sup>153</sup>          | 40              | ND         | ND                       | 1.2:1                    | 1.8:1 | 33           |
| Jobes <i>et al.</i> , 1995 <sup>125</sup>           | 46              | MON < EMP  | MON < EMP                | 0.5:1                    | 1.1:1 | 55           |
| Shore-Lesserson <i>et al.</i> , 1998 <sup>154</sup> | 20              | ND         | ND                       | 0.8:1                    | 1.1:1 | 27           |

Protamine doses were either administered based on empiric dosing schemes using initial or total heparin doses used or monitoring protocols.

ND = no difference; NE = not examined; EMP = empiric dosing schemes; MON = monitoring protocols.

\* Protamine (mg) to heparin (mg) ratio calculated based on total heparin administered for cardiopulmonary bypass.

† Refers to percent change in protamine-to-heparin ratio between cohorts.

rin<sup>16,17,21,52,53,95,144,146-148,226</sup> may relate to suppression of Factor VIII-mediated platelet aggregation<sup>53</sup> or von Willebrand factor-related mechanisms.<sup>52</sup> However, other studies indicate that inhibition of platelet function by heparin may be detrimental, based on the lack of reversibility by routine doses of protamine,<sup>147</sup> which may relate to the degree of platelet inhibition.<sup>17,148</sup> In one study, 59% of patients displayed mild-to-moderate inhibition, whereas 33% of patients displayed severe inhibition, and the degree of platelet inhibition by heparin correlated with blood loss.<sup>148</sup> Although these findings explain how platelet inhibition can be interpreted as being synonymous with platelet dysfunction,<sup>16</sup> the duration of this inhibition by heparin has not been well-characterized, and it is uncertain whether the inhibition by heparin is dose-dependent within the range of heparin concentrations used clinically (1–5 U/ml). In addition, these studies did not evaluate whether heparin-mediated platelet inhibition was influenced by the dose of heparin required to obtain a therapeutic anticoagulant response for a given patient. Until these issues are resolved, maintenance of higher patient-specific heparin concentrations should be considered to reduce thrombin-mediated activation and consumption of platelets in patients requiring longer CPB intervals.

Monitoring protocols can markedly influence protamine doses used to neutralize heparin.<sup>78,125,149-154</sup> Two recent studies prospectively compared the use of a new, point-of-care hemostasis system (RxDx System, International Technidyne Corp.) to standard ACT-based empiric regimens in adult patients undergoing cardiac surgical procedures.<sup>125,154</sup> The RxDx system estimates patient-

specific anticoagulant response to heparin (*e.g.*, HRT), determines celite ACT values, and calculates protamine dose by using ACT-based approximations of heparin concentration (*e.g.*, protamine response test). When compared to control patients whose anticoagulation and reversal were based on empiric regimens, Jobes *et al.*<sup>125</sup> demonstrated that RxDx produced a 50% reduction in the protamine dose ( $P < 0.01$ ), which resulted in 50% less chest tube drainage ( $P = 0.01$ ) and 80% fewer transfusions ( $P = 0.02$ ) in the first 24 h postoperatively. In contrast, Shore-Lesserson *et al.*<sup>154</sup> did not observe a reduction in blood loss and transfusion requirements, nor was the protamine dose substantially decreased by use of the RxDx system.

Of eight published studies that specifically evaluated the clinical impact of reducing protamine dose, four showed either reduced blood loss or transfusion requirements,<sup>125,149-151</sup> whereas four did not.<sup>78,152-154</sup> However, a reduced protamine dose was not associated with increased blood loss or transfusion in any of these studies. The discrepancy in outcomes between these studies probably relates to differences in the relative extent of reduction in protamine dose and the overall protamine-to-heparin ratio in the intervention cohorts within these studies. Thus, in the four studies that showed a favorable difference in outcome, better bleeding or transfusion outcomes occurred when the reduction in protamine dose was approximately 50% or greater and when the protamine-to-heparin ratio was less than 1.<sup>125,149-151</sup> The four negative studies either had smaller reductions in protamine dose (27–38%) or protamine-to-heparin ratios consistently that were more than 1, or both (table 4). The decreases in perioperative

blood loss associated with reduced doses of protamine may result from less complement activation<sup>155</sup> or from reduced protamine-induced platelet dysfunction.<sup>19-21,156,157</sup> Based on our survey results (Appendix), 48% of clinicians polled probably administered excessive doses of protamine as a result of using empiric regimens based on a fixed ratio (e.g., 1:1 or greater) of protamine to the total heparin dose administered.

In summary, because several studies reveal limitations of ACT monitoring during CPB<sup>78,81-90</sup> and the detrimental effects of excessive protamine on platelet function (e.g., 50% reduction in the percentage of platelets expressing P-selectin after stimulation with thrombin receptor agonist peptide, or TRAP),<sup>21</sup> blood loss (e.g., increased by 100%), and transfusion requirements (increased by 100–400%),<sup>60,125,133,149-151</sup> significant refinements of the clinical practices used for determining heparin and protamine doses should be considered. New agents, such as recombinant platelet factor 4 (rPF4),<sup>158,159</sup> lactoferrin,<sup>69</sup> or the enzyme heparinase,<sup>21,160</sup> are being investigated as therapeutic alternatives to protamine for patients with known hypersensitivity to or history of catastrophic reactions to protamine. However, the finding that heparinase does not produce platelet dysfunction, (e.g., reduced thrombin receptor agonist peptide-mediated expression of P-selectin) suggests that these alternatives may also reduce bleeding.<sup>21</sup>

## Monitoring for Special Clinical Circumstances

### *Monitoring the Antithrombotic Properties of Heparin in Patients with Acquired or Hereditary Coagulation Factor Deficiency*

Heparin monitoring during CPB can pose particular difficulties in patients with acquired coagulopathies, such as warfarin therapy, or congenital deficiencies of the coagulation, contact Factor XII,<sup>161-168</sup> high-molecular-weight kininogen, or prekallikrein. The latter three deficiencies are not associated with abnormal bleeding even when the hemostatic system is challenged with surgical wounds. Baseline (i.e., prior to heparin administration) ACT values were substantially prolonged (i.e.,  $522 \pm 43$  s) in five asymptomatic patients with Factor XII deficiency.<sup>164,165,167-169</sup> Heparin monitoring can also be compromised in patients with congenital Factor XI deficiency, approximately half of whom have no increased risk of abnormal bleeding in daily life.<sup>170</sup> Moni-

toring heparin therapy with routinely used methods may also be challenging in patients with antiphospholipid antibodies.<sup>171,172</sup> In all of these situations, heparin cannot be monitored during CPB with the ACT<sup>165</sup> or with any other assay that depends on contact pathway activation (e.g., aPTT, HMT, SonACT). Although there is little published data about such patients, heparin can be monitored with on-site measurements of HiTT or HiPT, with whole blood heparin concentrations, or with a modification of the ACT method using plasma from an unaffected individual (e.g., FFP).<sup>169</sup>

Therapeutic warfarin anticoagulation has been shown to enhance the antithrombotic properties of heparin during CPB while paradoxically decreasing postoperative bleeding,<sup>67</sup> presumably by reducing activation and consumption of clotting factors during CPB. Heparin is still required because the warfarin-induced anticoagulation is insufficient for conducting CPB. Although there are no published studies to support this approach, it may be advantageous to use smaller doses of heparin in the presence of warfarin because these agents appear to be complementary or synergistic in reducing hemostatic system activation and inhibition of platelet function.<sup>17,148</sup> HiPT results would likely be misleading as a judge of adequate heparinization in the setting of therapeutic warfarin anticoagulation because of preexisting reduction in Factor VII by warfarin. Because the optimal dose of heparin with warfarin is unknown, we recommend a standard initial dose of heparin (e.g., 300 U/kg) because ACT and ACT-based tests (e.g., HDR and HRT assays) may be misleading in this setting. For heparin dosing during CPB, it is unclear whether it is preferable to use ACT values or a time-dependent, fixed dosing regimen or to maintain a reference whole blood heparin concentration obtained after administration of the standard initial dose of heparin.

### *Anticoagulation Monitoring and Neutralization in Pediatric Cardiac Surgery*

Despite a physiologic impact of CPB exceeding that for adults (e.g., more hemodilution), heparin anticoagulation and monitoring in children undergoing cardiac surgery has received relatively limited attention from clinical investigators.<sup>173,174</sup> Consequently, in most centers, CPB anticoagulation practices for children are extrapolated from those in adults.<sup>173-175</sup>

In children undergoing CPB, Andrew *et al.*<sup>173</sup> demonstrated that neither celite ACT nor kaolin ACT values correlated with heparin concentration, probably related to the deterioration in the ability of ACT values to reflect

heparin concentrations in the presence of more pronounced hemodilution in children. This contrasts with the weak correlation between either celite ( $r = 0.34$ ) or kaolin ACT ( $r = 0.59$ ) values and heparin concentration in adults.<sup>81</sup> As with the adult series, these investigators also observed higher celite ACT values throughout CPB compared to kaolin ACT values that may reflect the relative potency of these two activators or the concentrations chosen for the available test cartridges and tubes.<sup>173</sup> Whereas 94% of celite ACT values throughout CPB were more than 450 s, only 27% of kaolin ACT values exceeded 450 s.<sup>173</sup> The investigators reasoned that all patients would have received larger heparin doses during CPB if only kaolin ACT values had been used to guide heparin therapy. Therefore, it appears that ACT values (*i.e.*, celite more than kaolin) are prolonged to a greater extent during pediatric CPB, that this prolongation is most likely related to more pronounced hemodilution, and that this may lead to underdosing of heparin.

Heparin concentrations were assessed in three studies, although in each study the authors used ACT values alone to guide heparin dosing during CPB.<sup>173,174,176</sup> After the initial heparin dose (300 U/kg) and before starting CPB, *ex vivo* plasma heparin concentrations (using a thrombin clotting time assay), were similar (*e.g.*, 3 U/ml) to values observed in adults.<sup>173</sup> However, heparin levels decreased by approximately 50% at the onset of CPB despite administration of heparin in the CPB prime, suggesting the importance of the larger ratio of CPB circuit volume to blood volume in children *versus* adults with respect to hemodilution and heparin therapy during CPB.<sup>173,174</sup> In the second study, heparin concentrations were assessed by antithrombin and by anti-Factor Xa assay.<sup>174</sup> Anti-IIa heparin levels were lower than anti-Factor Xa levels ( $P < 0.001$ ) throughout CPB, suggesting faster clearance of larger molecular weight fractions of heparin.<sup>174</sup> A good correlation ( $r = 0.9$ ) was observed between the assays throughout CPB, and both assays displayed a significant decrease in heparin levels immediately after starting CPB. In the third study,<sup>176</sup> larger doses of heparin in the CPB prime (3 *vs.* 1 U/ml) caused higher heparin levels after initiation of CPB, and this was accompanied by D-dimer levels that tended to be lower ( $P = 0.06$ ). This finding suggests that children require heparin concentrations in the CPB prime that either approximate or exceed those used for adults.<sup>176</sup>

D'Errico *et al.*<sup>177</sup> used the HDR assay to estimate heparin requirements in children before the start of CPB and to determine the sensitivity to heparin in four age

groups: (1) infants (younger than 1 yr), (2) preschool (1 to 5 yr), (3) school age (5 to 14 yr), and (4) adults (more than 14 yr). The target heparin concentration (THC) required to achieve a kaolin ACT of 480 s in preschool children was approximately 30% more than in adults, whereas the initial heparin dose (as measured in U/kg) required to achieve this THC was 50% more than that needed to achieve the same ACT in adults.<sup>177</sup> The THC needed for school-aged children did not differ from that needed for adults. However, although the THC in infants was similar to that for adults, the initial heparin dose needed to achieve it involved significantly larger values (*e.g.*,  $578 \pm 220$  U/kg) compared to that needed for school-aged children and adults.<sup>177</sup> These results suggest that either the Hepcon system did not calculate an accurate blood volume for these children or preschool children have increased heparin binding by endothelial cells or heparin binding proteins. In addition, all children younger than 5 yr require significantly larger total heparin doses to achieve a given THC, which may relate to lower ATIII levels, especially in infants younger than 6 months of age.<sup>175</sup>

Although this reduced responsiveness to heparin does not necessarily relate to ATIII concentration, the findings observed by Hashimoto *et al.*<sup>64</sup> indicate that ATIII supplementation can reduce thrombin activity during CPB when ATIII levels decrease because of hemodilution or consumption. More clinical studies that evaluate anticoagulation and the hemostatic system in children undergoing CPB are needed to identify anticoagulation and monitoring strategies that optimize thrombin suppression while minimizing bleeding and transfusion.

#### *Monitoring in Patients Undergoing Procedures Involving Use of Heparin-bonded Circuits*

In an attempt to simulate the antithrombotic properties of the normal endothelial surface, heparin has been bonded to the extracorporeal circuit. Although not universal,<sup>178</sup> several studies have shown that this approach attenuates the inflammatory response to CPB as reflected by reduced complement<sup>179-185</sup> and granulocyte activation.<sup>180,182,183,185,186</sup> Numerous studies evaluating the potential for heparin-coated circuits to preserve hemostasis have not shown consistent reduction in sensitive biochemical markers of hemostatic system activation.<sup>178,180,182,183,185,187-197</sup> Some studies using reduced systemic heparin doses showed increased activation with heparin-coated circuits (as evidenced by increases in prothrombin fragment 1.2, FPA, D-dimer, and  $\beta$  thromboglobulin values).<sup>192,198,199</sup> However, others

showed either no significant differences<sup>195,200</sup> or reductions in these markers both in *ex vivo*<sup>200</sup> and in simulated CPB models.<sup>201</sup> Use of heparin-bonded circuits has been associated with reduced platelet activation when small doses of heparin are used.<sup>198,199</sup> However, findings have been inconsistent when routine doses of heparin are used, some showing lower platelet activation,<sup>180,195</sup> whereas others show no difference.<sup>190,193</sup> Smaller heparin doses and ACT thresholds have been advocated when heparin-coated circuits are used based on data from a few studies that demonstrated reduced blood loss, transfusion requirements, and a seemingly similar risk of perioperative thrombotic complications.<sup>180,187-191</sup>

However, the majority of these studies summarized in table 5, used short CPB intervals and were not powered adequately to clearly address safety of lower heparin doses with heparin-coated circuits with respect to thrombotic complications. In addition, some of these studies showed larger increases in markers of coagulation activation in patients who receive lower heparin doses during use of heparin-bonded circuits,<sup>192,198</sup> and others described thrombotic events when extracorporeal life support was used without systemic anticoagulation<sup>202</sup> or with lower doses of heparin.<sup>203</sup> This has led Edmunds<sup>204</sup> to suggest that lowering heparin dose with heparin-coated circuits is inappropriate because of the lack of adequate safety data. In the absence of large-scale trials that address conclusively this important safety issue, we agree with his conclusion.

#### New Drugs and Monitoring Implications

**Aprotinin.** Aprotinin, a nonspecific serine protease inhibitor that inhibits trypsin, plasmin, and kallikrein, markedly decreases bleeding after cardiac procedures involving extracorporeal circulation.<sup>205</sup> Aprotinin can reduce activation of the hemostatic system by inhibiting the contact,<sup>206-210</sup> and possibly tissue factor,<sup>211</sup> pathways, as reflected by decreased thrombin generation and activity during CPB.<sup>209,212</sup> However, it may potentially lead to a hypercoagulable state caused by inhibition of plasmin,<sup>206</sup> protein C, or both.<sup>213,214</sup> Because inhibition of protein C may more likely occur at plasma concentrations more than 250 KIU/ml,<sup>214</sup> weight-adjusted dosing regimens should be considered, especially in smaller patients when a full dose (*i.e.*, Hammersmith regimen, package insert, Bayer Corporation, West Haven, CT) is used. Because thromboembolic complications initially were reported in cardiac patients whose heparin administration was based on celite ACT protocols,<sup>215-217</sup> sev-

eral investigations have assessed the impact of aprotinin on coagulation assays.

Initial investigations showed that celite ACT values are prolonged both *in vitro*<sup>218</sup> and *ex vivo*<sup>88</sup> when routine doses of heparin and aprotinin are used. Prolongation of celite ACT values by aprotinin may relate to inhibition of kallikrein,<sup>206</sup> Hageman factor (Factor XII),<sup>207</sup> and Factor IX activation<sup>208</sup> by aprotinin. Because recent evidence indicates that aprotinin inhibits the tissue factor pathway by binding the Factor VIIa tissue factor complex,<sup>211</sup> celite ACT measurements might therefore also be prolonged *via* reduced tissue factor-mediated activation of Factor IX.<sup>219</sup> This interaction is important because significant tissue factor pathway-mediated activation of the extrinsic pathway has been identified during CPB.<sup>9</sup> Prolongation of celite ACT may also reflect aprotinin's intrinsic anticoagulant properties.<sup>209,210</sup> When compared to an aprotinin concentration of 200 KIU/ml, the equipotent dose of heparin required to inhibit whole blood clotting time is 0.69 U/ml.<sup>210</sup> In summary, the prolongation of celite ACT<sup>218</sup> may reflect aprotinin's anticoagulant properties,<sup>209,210</sup> inhibition of contact activation,<sup>207</sup> or ability to preferentially inhibit celite-mediated activation *in vitro*.<sup>89</sup>

Patients receive smaller heparin doses and have lesser blood heparin concentrations when heparin dosing is guided by celite ACT protocols during aprotinin administration.<sup>220</sup> Although some researchers have suggested that aprotinin is a heparin-sparing agent,<sup>221</sup> Hunt *et al.*<sup>222</sup> suggested that heparin doses be administered to maintain celite ACT values greater than 750 s when aprotinin is used. Because of the potential risks of subtherapeutic heparin anticoagulation,<sup>203,223</sup> the package insert recommends that adequate heparin anticoagulation be maintained by using clotting assays that are unaffected by aprotinin (Aprotinin package insert; Bayer Inc.). Aprotinin generally does not affect kaolin ACT,<sup>88,218</sup> most likely because kaolin more potently activates coagulation than celite<sup>89</sup> and because aprotinin binds kaolin.<sup>224</sup> However, data from a recent study<sup>210</sup> indicate that kaolin ACT values are slightly prolonged in the presence or absence of heparin after aprotinin doses of 400 KIU/ml, which supports previous findings that aprotinin prolongs kaolin-activated aPTT measurements.<sup>225</sup> Alternative possibilities for monitoring heparin anticoagulation in the presence of aprotinin include the HiTT, the HMT, and the HiPT. Although the HiTT is unaffected by aprotinin,<sup>107,108</sup> recent evidence reveals only a modest correlation ( $r = 0.52$ ) with heparin levels during CPB.<sup>91</sup> Although HMT measurements were unaffected by apro-



**Table 5. Studies That Have Examined the Effect of Heparin-coated Circuits on Blood Loss, Transfusion, Thromboembolic Complications, or Markers of Hemostatic System Activation**

| Reference                          | No. of Patients   | Heparin Protocol*   |                     | CPBT (min) | Design | Blood Loss (ml/24 h)† |                 | Transfusion‡ (NC vs. C)             | Thromboembolic Complications, % (NC vs. C) | Activation Markers        |
|------------------------------------|-------------------|---------------------|---------------------|------------|--------|-----------------------|-----------------|-------------------------------------|--------------------------------------------|---------------------------|
|                                    |                   | NC                  | C                   |            |        | NC                    | C               |                                     |                                            |                           |
| Kutonen, 1997 <sup>192</sup>       | 30                | 300 U/kg<br>> 480 s | 100 U/kg<br>> 200 s | 84         | P,R    | 991 (600–1420)        | 880 (410–1,600) | ND 47% vs. 40%                      | MI, CVA, D: 7 vs. 20                       | ↑ F1.2, DD, FPA in coated |
| Aldea, 1996 <sup>187</sup>         | 234               | HDR > 480 s         | HDR > 280 s         | 88         | P,R    | 651 ± 403             | 561 ± 257\$     | ↓ 32% vs. 48%<br>↓ 2.0 U vs. 4.3 U  | MI, CVA, D\$; 9 vs. 2                      | NA                        |
| Shapira, 1996 <sup>188</sup>       | C = 120, NC = 232 | 300 U/kg<br>> 480 s | 100 U/kg<br>> 280 s | 118        | Ret    | 1054 ± 911            | 558 ± 466\$     | ↓ 64% vs. 86%<br>↓ 18.6 U vs. 6.9 U | MI, CVA, D: 10 vs. 7                       | NA                        |
| Ovrum, 1996 <sup>185</sup>         | C = 17, NC = 16   | 400 U/kg<br>> 480 s | 100 U/kg<br>> 250 s | 49         | P,R    | 628 (420–1360)        | 615 (265–1,035) | 2 U vs. 0 U                         | MI, D: 3 vs. 0                             | ↑ F1.2, ↓ BTG in coated   |
| Ovrum, 1995 <sup>179</sup>         | C = 17, NC = 18   | 400 U/kg<br>> 480 s | 100 U/kg<br>> 250 s | 47         | P,R    | 675 (355–1305)        | 620 (405–830)   | ND                                  | ND                                         | NA                        |
| Aldea, 1996 <sup>326</sup>         | C = 9, NC = 455   | 300 U/kg<br>> 480 s | 100 U/kg<br>> 280 s | 88         | P      | 984 ± 616             | 323 ± 67\$      | ↓ 0% vs. 68%                        | MI, CVA, D: 4 vs. 0                        | NA                        |
| von Segressor, 1994 <sup>190</sup> | 104               | 300 U/kg<br>> 480 s | 100 U/kg<br>> 180 s | 69         | P,R    | 1039 ± 732            | 790 ± 393\$     | ↓ 46% vs. 86%<br>↓ 300 vs. 957 ml   | MI, VGP, D: 6 vs. 6                        | NA                        |
| Fosse, 1994 <sup>182</sup>         | 20                | 400 U/kg<br>> 480 s | 150 U/kg<br>> 150 s | 90         | P,R    | 662 (550–805)         | 660 (480–700)   | ND                                  | NA                                         | NA                        |
| Sellevoid, 1994 <sup>178</sup>     | 20                | 300 U/kg<br>> 480 s | 150 U/kg<br>> 240 s | 79         | P,R    | 638 ± 213             | 646 ± 313       | ND, autotransfusion                 | NA                                         | NA                        |
| von Segressor, 1993 <sup>190</sup> | 15                | 300 U/kg<br>> 480 s | 100 U/kg<br>> 180 s | 72         | P,R    | 432 ± 162             | 311 ± 111       | ↓ 143 vs. 416                       | NA                                         | NA                        |
| Borowiec, 1992 <sup>196</sup>      | 14                | 300 U/kg<br>> 400 s | 225 U/kg<br>> 300 s | 94         | P,     | 10 ml/kg              | 8.7 ml/kg       | 390 vs. 600 RC<br>840 vs. 380 FFP   | NA                                         | NA                        |
| Borowiec, 1992 <sup>191</sup>      | 20                | 300 U/kg<br>400 s   | 150 U/kg<br>> 250 s | 85         | P,R    | 559 ± 24              | 786 ± 65\$      | 10 vs. 9.1 RC<br>8.9 vs. 10.8 FFP   | NA                                         | ↓ FDPs in coated          |
| Fukutomi, 1996 <sup>180</sup>      | 20                | 250 U/kg            | > 400 s             | 168        | P,R    | 1350 ± 125            | 600 ± 250\$     | 40% vs. 30%                         | NA                                         | ↓ BTG in coated           |
| Boonstra, 1994 <sup>193</sup>      | 30                | 300 U/kg            | 400–800 s           | 94         | P,R    | 931 ± 136             | 709 ± 101       | ND                                  | NA                                         | ND                        |
| Wagner, 1994 <sup>194</sup>        | 20                | 300 U/kg            | > 480 s             | 140        | P,R    | 1226 ± 180            | 1064 ± 153      | ND, 2/10 vs. 3/10                   | NA                                         | ND                        |
| Gorman, 1996 <sup>195</sup>        | 20                | 300 U/kg            | > 400 s             | 117        | P,R    | 555 ± 83              | 780 ± 213\$     | ↑ 35 U vs. 92 U\$                   | NA                                         | ↑ Pit Agg in coated       |

C = heparin-coated; NC = not coated; CPBT = mean times for cardiopulmonary bypass; P = prospective; Ret = retrospective; R = randomized; D = no difference; MI = myocardial infarction; CVA = cerebrovascular accident; VGP = vein graft patency; D = death; NA = not assessed; F1.2 = prothrombin fragment 1.2; BTG =  $\beta$  thromboglobulin; FPA = fibrinogen; Pit Agg = platelet aggregation; HDR = heparin dose response; DD = D-dimers; RC = red cells; FFP = fresh frozen plasma.

\* Protocols for initial and subsequent (i.e., during CPB) administration of heparin for patients treated with heparin-coated vs. not-coated circuits.

† Values are mean  $\pm$  SD or mean (95% confidence intervals) of chest tube drainage in the first 24 h in the intensive care unit with the exception of Kutonen *et al.*<sup>192</sup> (16 h).

‡ Summarized as either the percentage of patients requiring transfusion, mean units required, or volume of red blood cells required; decreased/increased requirements are displayed as arrows.

\$  $P < 0.05$ .

tinin in one evaluation,<sup>105</sup> data from another study suggest that they are.<sup>106</sup> The HiPT, which evaluates the antithrombotic properties of heparin *via* extrinsic pathway activation, also is unaffected by aprotinin<sup>108</sup>; however, more clinical trials are needed to characterize its potential usefulness.

Finally, methods that measure heparin concentration can be used to monitor heparin during CPB in patients receiving aprotinin. However, only the HepTest and the automated protamine titration assay have been evaluated for potential interactions with aprotinin. Although aprotinin also does not affect these two measurement systems,<sup>92,100</sup> either one should be accompanied by an assay that accurately evaluates the anticoagulant properties of heparin, such as the kaolin ACT, despite the presence of aprotinin. Although use of heparin concentration methods will result in administration of greater doses of heparin, this is not necessarily disadvantageous because aprotinin attenuates the inhibition of platelet function by heparin<sup>226</sup> and reduces heparin-related bleeding when higher doses of heparin are administered.<sup>144</sup> Other promising broad-spectrum protease inhibitors, such as nafamostat, are undergoing investigation during extracorporeal circulation,<sup>227</sup> but very little information is available about the impact of these agents on heparin monitoring systems. Because these studies reveal that celite ACT values increase markedly with the presence of heparin and aprotinin, alternative possibilities (*e.g.*, kaolin ACT, whole blood heparin concentration, HiTT, HMT, and HiPT) for monitoring heparin anticoagulation in the presence of aprotinin should be used.

**Antithrombin III.** Enhancement of heparin's antithrombotic properties by ATIII supplementation can potentially preserve the hemostatic system during CPB, especially in patients who have acquired ATIII deficiency related to preoperative heparin infusions,<sup>65-68</sup> excessive CPB-related hemodilution (or both), or consumption.<sup>25,65,66</sup> The initial findings of decreased thrombin (*e.g.*, fibrinopeptide A) activity observed by Hashimoto *et al.*<sup>64</sup> in pediatric patients supplemented with pooled ATIII concentrates was recently confirmed by Levy *et al.*<sup>228</sup> using recombinant (*i.e.*, transgenic) ATIII. Inverse relations were observed between ATIII concentration and markers of thrombin (*e.g.*, fibrin monomer) and fibrinolytic (D-dimer) activity in this latter study.<sup>228</sup> As previously addressed, available methods, such as the HDR and HRT tests, can potentially identify patients with heparin resistance from ATIII deficiency.<sup>61</sup>

**Platelet Inhibitors.** Infusion of the antiplatelet agent dipyridamole decreases platelet activation and depletion during extracorporeal circulation. In a prospective, randomized trial comparing dipyridamole to placebo, postoperative blood loss and transfusion requirements decreased significantly, but the magnitude of change was small.<sup>229</sup> Fish *et al.*<sup>230</sup> found significant platelet-sparing properties with prostacyclin, whereas DiSesa *et al.*<sup>231</sup> found none. These inconsistent findings, combined with the occurrence of hypotension, explain why prostacyclin has never gained popularity for routine use during CPB. Other reports have detailed the variable effectiveness of preoperative antiplatelet agents, such as aspirin and dipyridamole,<sup>232-234</sup> or the effectiveness of intraoperative administration of nonspecific platelet inhibitors, such as prostacyclin,<sup>157</sup> or prostaglandin E<sub>1</sub>,<sup>235</sup> as supplements to heparin in patients with heparin-induced thrombocytopenia (HIT). Newly developed specific platelet glycoprotein receptor blockers, such as abciximab (Reopro; Eli Lilly, Indianapolis, IN),<sup>236</sup> have been shown to reduce thrombotic complications related to coronary angioplasty procedures. Platelet inhibitors may be useful in patients with HIT if they are reversible or have short pharmacokinetic half-lives similar to agents such as eptifibatide (Integrelin; COR Therapeutics, San Francisco, CA) or tirofiban (Aggrastat; Merck & Co., Inc., West Point, PA). These agents also may be useful as a heparin adjunct to preserve platelets during CPB.<sup>237,238</sup>

Synergistic prolongation of clot times by heparin and abciximab has been previously reported<sup>87,239,240</sup> and may lead to marked prolongations of ACT values during CPB. This synergistic prolongation may relate in part to inhibition by abciximab of thrombin generation,<sup>241</sup> greater preferential inhibition of platelet-mediated prothrombin activation by heparin, or both.<sup>242</sup> Although platelets may be preserved during CPB by agents such as eptifibatide<sup>238</sup> or bistratin,<sup>237</sup> heparin doses should not be decreased in cardiac surgical patients who have received these new Gp IIb/IIIa inhibitors until safety data regarding the use of lower heparin doses have accumulated. New point-of-care platelet function tests potentially can be used to assess the degree of platelet inhibition during CPB and guide therapy in patients with excessive bleeding after CPB. These tests include the following: *in vitro* bleeding time<sup>243,244</sup>; platelet-mediated clot retraction<sup>245,246</sup>; tests of clot viscoelastic properties, such as thromboelastography or sonoclot analysis<sup>247-249</sup>; agglutination of fibrinogen-coated beads<sup>250</sup>; platelet activating factor-mediated clot acceleration<sup>239,251,252</sup>; point-of-care adaptations of glass bead re-

tention<sup>253</sup>; hemostatometry<sup>17,226</sup>; or whole blood impedance aggregometry (Chronolog Corp., Havertown, PA).<sup>254</sup>

**LMWH, Heparinoids, and Defibrinogenating Agents.** Newly developed antithrombotic agents may decrease consumption of coagulation factors and platelets by overcoming heparin's inability to completely inhibit clot-bound thrombin<sup>47</sup> and platelet-bound Va/Xa activity.<sup>255,256</sup> Heparin analogues or derivatives, such as dermatan sulfate,<sup>257</sup> LMWH (e.g., dalteparin),<sup>258</sup> or the heparinoid Orgaran (Org 10172; Organon Teknika, Oss, The Netherlands) that consist of heparan, chondroitin, and dermatan sulfate<sup>259-263</sup> can decrease activation of the hemostatic system by inhibiting thrombin, Factor Xa, or both. Dermatan sulfate predominately inhibits thrombin. LMW heparin preferentially inhibits Factor Xa but also inhibits thrombin to a lesser extent, whereas Orgaran inhibits thrombin and Factor Xa to the same extent. LMW heparin and Orgaran both are neutralized incompletely by protamine, which limits the clinical usefulness of these agents. In fact, the lack of reversibility has led to excessive blood loss after CPB in patients who received these agents.<sup>262-265</sup> However, new agents such as heparinase,<sup>21,160</sup> recombinant platelet factor 4,<sup>158,159</sup> and protamine derivatives<sup>266</sup> have been shown to reverse LMWH. Monitoring the antithrombotic properties of LMWH and Orgaran during CPB can be difficult; however, assays such as the Heptest that directly assess anti-Xa and anti-IIa activity may be useful.

Defibrinogenating agents such as anicrod (Knoll Pharmaceuticals, Mt Olive, NJ)<sup>267,268</sup> have been used instead of heparin in patients with HIT, but blood loss has been excessive because fibrinogen must be replaced before clotting can resume.<sup>267</sup> New whole blood fibrinogen assays may potentially be useful when defibrinogenating agents, such as Anicrod, are used to confirm therapeutic hypofibrinogenemia during CPB and restoration of levels after CPB.<sup>269</sup>

**Direct Thrombin Inhibitors and Other New Anticoagulants.** Newly developed direct thrombin inhibitors, such as hirulog,<sup>270</sup> recombinant hirudin,<sup>271,272</sup> argatroban,<sup>273</sup> thrombin inhibitor peptide,<sup>274</sup> or polypeptide aptamer,<sup>275</sup> that do not require ATIII or HCII to inhibit even clot-bound thrombin (fig. 3) can circumvent some of the limitations of heparin and may be useful in patients with HIT. Although bleeding complications potentially can result from their potent binding of thrombin and the lack of reversal agents, recombinant hirudin

or lepirudin (Refludan; Hoechst Marion, Roussel, Kansas City, MO) has been used in a few patients without major bleeding complications.<sup>271,272,276</sup> Concurrent use of a platelet inhibitor may be necessary for patients whose anticoagulation regimen during CPB involves the use of direct thrombin inhibitors because these agents do not directly inhibit platelets. This is shown by the marked decrease in platelet function during CPB in two patients who received hirudin.<sup>271,272</sup> Although aPTT values have been used to monitor patients who received hirudin,<sup>271,272</sup> a poor correlation between hirudin concentration and ACT or aPTT values was observed in one recent study.<sup>277</sup> The ecarin clotting assay, a clot-based method that uses a prothrombin-activating snake venom derivative, can be measured using the TAS instrument and may be a reasonable alternative monitoring method. A good correlation ( $r^2 = 0.63$ ) was observed between recombinant hirudin levels and ecarin clotting-time values in eight patients during CPB.<sup>277</sup> However, ecarin clotting-time values can be substantially prolonged by hemodilution (i.e., > 30%),<sup>277</sup> which may necessitate use of a modified version (e.g., using platelet-poor plasma) of the test. Finally, assays such as the Heptest that directly assess anti-Xa and anti-IIa activity also may be useful; however, little information is available regarding the use of this assay to monitor anticoagulation during CPB with hirudin.

Another new agent, pentosanpolysulfate, recently was used as a heparin alternative during CPB.<sup>278,279</sup> In two preliminary reports, ACT was used for monitoring when pentosanpolysulfate was used as a heparin alternative during CPB.<sup>278,279</sup>

New inhibitors of other factors within the intrinsic (e.g., Factor VIII-Factor IX complex inhibitor, tick anticoagulant peptide)<sup>280,281</sup> and tissue factor<sup>282</sup> pathways are being developed and may be useful in decreasing activation of the hemostatic system during CPB (fig. 5). Unfortunately, there is very little information available about monitoring anticoagulation with new inhibitors of other factors within the intrinsic<sup>280,281</sup> and tissue factor<sup>282</sup> pathways. The authors of this review claim that available point-of-care anticoagulation monitors will be inadequate for a number of these new agents. Ideal point-of-care monitoring systems should accurately reflect thrombin activity, and possibly also fibrinolytic activity and platelet activation or function, and should only be influenced by hypothermia and hemodilution if these variables affect the endpoints that are being assessed (e.g., *in vivo* thrombin activity).

## ANTICOAGULATION MONITORING DURING CARDIAC SURGERY

**Fig. 5.** Emerging heparin adjuncts and alternatives that inhibit hemostatic system activation or, more specifically, that inhibit thrombin and fibrinolysis. Newer antithrombotic agents include inhibitors of the contact and tissue factor paths, Factor Xa inhibitors, direct thrombin inhibitors, indirect thrombin inhibitors, or miscellaneous agents, such as pentosan polysulfate, heparin-coated cardiopulmonary bypass (CPB) circuits, or recombinant thrombomodulin. LMW = low-molecular-weight heparin; TAP = tick anticoagulant peptide; PGE<sub>1</sub> = prostaglandin E<sub>1</sub>; PGI<sub>2</sub> = prostaglandin I<sub>2</sub>; rh ATIII = recombinant human antithrombin III; HC II = heparin cofactor II; pooled ATIII = pooled plasma-derived antithrombin III concentrates; FVIII-IX complex = Factor VIII-IX complex assembly inhibitor; FFR-rVIIa = FFR-ck-active-site-inhibited recombinant Factor VIIa; rTFPI = recombinant tissue factor pathway inhibitor; TIP = thrombin inhibitor peptide.

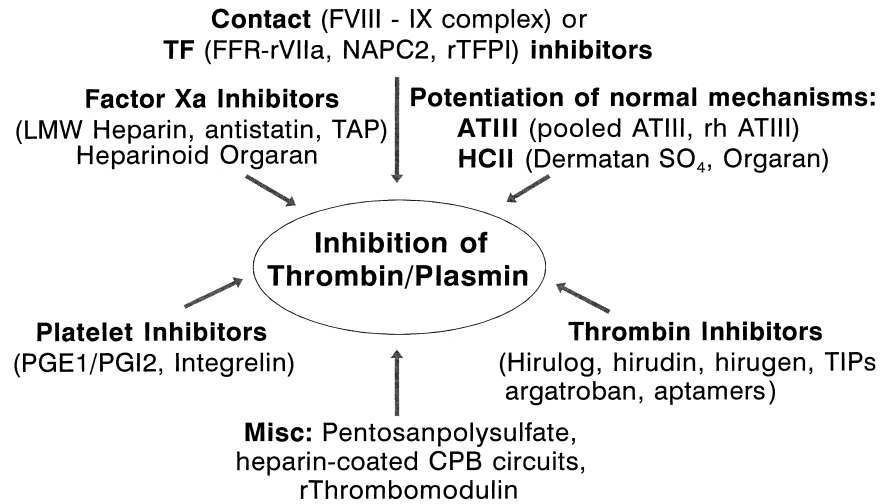

## Summary

The literature does not consistently support the importance of anticoagulation monitoring techniques during CPB. This is best reflected by studies that have evaluated the impact of the ACT method on blood loss and transfusion outcomes. Inconsistent findings from studies that evaluated the impact of ACT monitoring may be related to either suboptimal study design (*i.e.*, retrospective, unblinded, nonrandomized) or possibly the diagnostic imprecision of the ACT method used in these studies. There are a small number of well-controlled studies, some of which suggest that bleeding and transfusion outcomes can be improved by refining heparin monitoring techniques, either by sustaining better anticoagulation during CPB or by optimizing protamine doses (*i.e.*, when empiric protocols result in excessive protamine doses). More well-controlled studies are needed to better define the importance of anticoagulation management during CPB.

The authors thank Robert Baugh, Ph.D., for his technical assistance with the survey within this manuscript and Rao Saleem, M.D., and Tina Tapas for their assistance with the preparation of this manuscript.

## References

- Hardy JF, Perrault J, Tremblay N, Robitaille D, Blain R, Carrier M: The stratification of cardiac surgical procedures according to use of blood products: A retrospective analysis of 1480 cases. *Can J Anaesth* 1991; 38:511-7
- Despotis GJ, Santoro SA, Spitznagel E, Kater KM, Cox JL, Barnes P, Lappas DG: Prospective evaluation and clinical utility of on-site monitoring of coagulation in patients undergoing cardiac operation. *J Thorac Cardiovasc Surg* 1994; 107:271-9
- Khuri SF, Wolfe JA, Josa M, Axford TC, Szymanski I, Assousa S, Ragno G, Patel M, Silverman A, Park M: Hematologic changes during and after cardiopulmonary bypass and their relationship to the bleeding time and nonsurgical blood loss. *J Thorac Cardiovasc Surg* 1992; 104:94-107
- Despotis GJ, Filos KS, Zoys TN, Hogue CWJ, Spitznagel E, Lappas DG: Factors associated with excessive postoperative blood loss and hemostatic transfusion requirements: A multivariate analysis in cardiac surgical patients. *Anesth Analg* 1996; 82:13-21
- Woodman RC, Harker LA: Bleeding complications associated with cardiopulmonary bypass. *Blood* 1990; 76:1680-97
- Gammie JS, Zenati M, Kormos RL, Hattler BG, Wei LM, Pellegrini RV, Griffith BP, Dyke CM: Abciximab and excessive bleeding in patients undergoing emergency cardiac operations. *Ann Thorac Surg* 1998; 65:465-9
- Kalter RD, Saul CM, Wetstein L, Soriano C, Reiss RF: Cardiopulmonary bypass. Associated hemostatic abnormalities. *J Thorac Cardiovasc Surg* 1979; 77:427-35
- Heimark RL, Kurachi K, Fujikawa K, Davie EW: Surface activation of blood coagulation, fibrinolysis and kinin formation. *Nature* 1980; 286:456-60
- Boisclair MD, Lane DA, Philippou H, Esnouf MP, Sheikh S, Hunt B, Smith KJ: Mechanisms of thrombin generation during surgery and cardiopulmonary bypass. *Blood* 1993; 82:3350-7
- de Haan J, Boonstra PW, Monnick SH, Ebels T, van Oeveren W: Retransfusion of suctioned blood during cardiopulmonary bypass impairs hemostasis. *Ann Thorac Surg* 1995; 59:901-7
- Holloway DS, Summaria L, Sandesara J, Vagher JP, Alexander JC, Caprini JA: Decreased platelet number and function and increased fibrinolysis contribute to postoperative bleeding in cardiopulmonary bypass patients. *Thromb Haemost* 1988; 59:62-7
- Yoshihara H, Yamamoto T, Mihara H: Changes in coagulation



and fibrinolysis occurring in dogs during hypothermia. *Thromb Res* 1985; 37:503-12

13. Tabuchi N, de Haan J, Boonstra PW, van Oeveren W: Activation of fibrinolysis in the pericardial cavity during cardiopulmonary bypass. *J Thorac Cardiovasc Surg* 1993; 106:828-33

14. Stibbe J, Klufft C, Brommer EJ, Gomes M, de Jong DS, Nauta J: Enhanced fibrinolytic activity during cardiopulmonary bypass in open-heart surgery in man is caused by extrinsic (tissue-type) plasminogen activator. *Eur J Clin Invest* 1984; 14:375-82

15. Hirsh J: Heparin. *N Engl J Med* 1991; 324:1565-74

16. Khuri SF, Valeri CR, Loscalzo J, Weinstein MJ, Birjiniuk V, Healey NA, MacGregor H, Doursounian M, Zolkewitz MA: Heparin causes platelet dysfunction and induces fibrinolysis before cardiopulmonary bypass. *Ann Thorac Surg* 1995; 60:1008-14

17. John LC, Rees GM, Kovacs IB: Inhibition of platelet function by heparin. An etiologic factor in postbypass hemorrhage. *J Thorac Cardiovasc Surg* 1993; 105:816-22

18. Cobel-Geard RJ, Hassouna HI: Interaction of protamine sulfate with thrombin. *Am J Hematol* 1983; 14:227-33

19. Shigeta O, Kojima H, Hiramatsu Y, Jijuya T, Terarad Y, Atsumi N, Sakakibara Y, Nagasawa T, Mitsui T: Low dose protamine based on heparin-protamine titration method reduces platelet dysfunction after cardiopulmonary bypass. *J Thorac Cardiovasc Surg* 1999; 118:354-60

20. Mochizuki T, Olson PJ, Ramsay JG, Szlam F, Levy JH: Does protamine reversal of heparin affect platelet function (abstract)? *Anesth Analg* 1997; 84:SCA35

21. Ammar T, Fisher CF: The effects of heparinase 1 and protamine on platelet reactivity. *ANESTHESIOLOGY* 1997; 86:1382-6

22. Wachtfogel YT, Kucich U, Greenplate J, Glusko P, Abrams W, Weinbaum G, Wenger RK, Rucinski B, Niewiarowski S, Edmunds LH Jr: Human neutrophil degranulation during extracorporeal circulation. *Blood* 1987; 69:324-30

23. Clauss M, Grell M, Fangmann C, Fiers W, Scheurich P, Risau W: Synergistic induction of endothelial tissue factor by tumor necrosis factor and vascular endothelial growth factor: Functional analysis of the tumor necrosis factor receptors. *FEBS Lett* 1996; 390:334-8

24. van der Poll T, Jansen PM, Van Zee KJ, Welborn MB, de Jong I, Hack CE, Loetscher H, Lesslauer W, Lowry SF, Moldawer LL: Tumor necrosis factor- $\alpha$  induces activation of coagulation and fibrinolysis in baboons through an exclusive effect on the p55 receptor. *Blood* 1996; 88:922-7

25. Despotis GJ, Joist JH, Hogue CW, Alsoufiev A, Joiner-Maier D, Santoro SA, Spitznagel E, Weitz J, Goodnough LT: More effective suppression of hemostatic system activation in patients undergoing cardiac surgery by heparin dosing based on heparin blood concentrations rather than ACT. *Thromb Haemostas* 1996; 76:902-8

26. Boisclair MD, Lane DA, Philippou H, Sheikh S, Hunt B: Thrombin production, inactivation and expression during open heart surgery measured by assays for activation fragments including a new ELISA for prothrombin fragment F1 + 2. *Thromb Haemost* 1993; 70:253-8

27. Slaughter TF, LeBleu TH, Douglas JM Jr, Leslie JB, Parker JK, Greenberg CS: Characterization of prothrombin activation during cardiac surgery by hemostatic molecular markers. *ANESTHESIOLOGY* 1994; 80:520-6

28. Menges T, Wagner RM, Welters I, Ruwoldt R, Boldt J, Hempelmann G: The role of the protein C-thrombomodulin system and fibrinolysis during cardiovascular surgery: Influence of acute preoperative plasmapheresis. *J Cardiothorac Vasc Anesth* 1996; 10:482-9

29. Hunt BJ, Parratt RN, Segal HC, Sheikh S, Kallis P, Yacoub M:

Activation of coagulation and fibrinolysis during cardiothoracic operations. *Ann Thorac Surg* 1998; 65:712-8

30. Marder VJ, Feinstein DI, Francis CW, Colman RW: Consumptive thrombohemorrhagic disorders, Hemostasis and Thrombosis: Basic Principles and Clinical Practice. Edited by Coleman RW, Hirsh J, Marder VJ, Salzman EW. Philadelphia, Lippincott-Raven, 1994, pp 1023-63

31. Gralnick HR, Fischer RD: The hemostatic response to open-heart operations. *J Thorac Cardiovasc Surg* 1971; 61:909-15

32. Harker LA, Malpass TW, Branson HE, Hessel EA II, Slichter SJ: Mechanism of abnormal bleeding in patients undergoing cardiopulmonary bypass: Acquired transient platelet dysfunction associated with selective alpha-granule release. *Blood* 1980; 56:824-34

33. Milam JD, Austin SF, Martin RF, Keats AS, Cooley DA: Alteration of coagulation and selected clinical chemistry parameters in patients undergoing open heart surgery without transfusions. *Am J Clin Pathol* 1981; 76:155-62

34. Adelman B, Michelson AD, Loscalzo J, Greenberg J, Handin RI: Plasmin effect on platelet glycoprotein Ib-von Willebrand factor interactions. *Blood* 1985; 65:32-40

35. Lu H, Soria C, Cramer EM, Soria J, Maclouf J, Perrot JY, Li H, Commin PL, Schumann F, Regnier O, et al: Temperature dependence of plasmin-induced activation or inhibition of human platelets. *Blood* 1991; 77:996-1005

36. Cramer EM, Lu H, Caen JP, Soria C, Berndt MC, Tenza D: Differential redistribution of platelet glycoproteins Ib and IIb-IIIa after plasmin stimulation. *Blood* 1991; 77:694-9

37. Lu H, Soria C, Commin PL, Soria J, Piwnicka A, Schumann F, Regnier O, Legrand Y, Caen JP: Hemostasis in patients undergoing extracorporeal circulation: The effect of aprotinin (Trasylol). *Thromb Haemost* 1991; 66:633-7

38. Gravlee GP, Haddon WS, Rothberger HK, Mills SA, Rogers AT, Bean VE, Buss DH, Prough DS, Cordell AR: Heparin dosing and monitoring for cardiopulmonary bypass. A comparison of techniques with measurement of subclinical plasma coagulation. *J Thorac Cardiovasc Surg* 1990; 99:518-27

39. Faraday N, Rosenfeld BA: In vitro hypothermia enhances platelet GPIIb-IIIa activation and P-selectin expression. *ANESTHESIOLOGY* 1998; 88:1579-85

40. Tanaka K, Takao M, Yada I, Yuasa H, Kusagawa M, Deguchi K: Alterations in coagulation and fibrinolysis associated with cardiopulmonary bypass during open heart surgery. *J Cardiothorac Anesth* 1989; 3:181-8

41. Czer LS: Mediastinal bleeding after cardiac surgery: Etiologies, diagnostic considerations, and blood conservation methods. *J Cardiothorac Anesth* 1989; 3:760-75

42. Harker LA: Bleeding after cardiopulmonary bypass. *N Engl J Med* 1986; 314:1446-8

43. George JN, Shattil SJ: The clinical importance of acquired abnormalities of platelet function. *N Engl J Med* 1991; 324:27-39

44. Bray B, Lane DA, Freyssinet JM, Pejler G, Lindahl U: Anti-thrombin activities of heparin. Effect of saccharide chain length on thrombin inhibition by heparin cofactor II and by antithrombin. *Biochem J* 1989; 262:225-32

45. Tollefsen DM: Insight into the mechanism of action of heparin cofactor II. *Thromb Haemost* 1995; 74:1209-14

46. Tollefsen FA, Fernandez F, Gauthier D, Buchanan MR: Heparin cofactor II and other endogenous factors in the mediation of the

## ANTICOAGULATION MONITORING DURING CARDIAC SURGERY

antithrombotic and anticoagulant effects of heparin and dermatan sulfate. *Semin Thromb Hemost* 1985; 86:385-91

47. Weitz JI, Hudoba M, Massel D, Maraganore J, Hirsh J: Clot-bound thrombin is protected from inhibition by heparin-antithrombin III but is susceptible to inactivation by antithrombin III-independent inhibitors. *J Clin Invest* 1990; 86:385-91

48. Choay J, Petitou M, Lormeau JC, Sinay P, Casu B, Gatti G: Structure-activity relationship in heparin: A synthetic pentasaccharide with high affinity for antithrombin III and eliciting high anti-factor Xa activity. *Biochem Biophys Res Commun* 1983; 116:492-9

49. Hirsh J, Raschke R, Warkentin TE, Dalen JE, Deykin D, Poller L: Heparin: Mechanism of action, pharmacokinetics, dosing considerations, monitoring, efficacy, and safety. *Chest* 1995; 108:258S-75S

50. Abildgaard U: Heparin/low molecular weight heparin and tissue factor pathway inhibitor. *Haemostasis* 1993; 23:103-6

51. Lindahl AK, Abildgaard U, Staalesen R: The anticoagulant effect in heparinized blood and plasma resulting from interactions with extrinsic pathway inhibitor. *Thromb Res* 1991; 64:155-68

52. Sobel M, McNeill PM, Carlson PL, Kermode JC, Adelman B, Conroy R, Marques D: Heparin inhibition of von Willebrand factor-dependent platelet function in vitro and in vivo. *J Clin Invest* 1991; 87:1787-93

53. Suzuki K, Nishioka J, Hashimoto S: Inhibition of factor VIII-associated platelet aggregation by heparin and dextran sulfate, and its mechanism. *Biochim Biophys Acta* 1979; 585:416-26

54. McAvoy TJ: Pharmacokinetic modeling of heparin and its clinical implications. *J Pharmacokinet Biopharm* 1979; 7:331-54

55. de Swart MAC, Nijmeyer B, Roelofs JMM, Sixma JJ: Kinetics of intravenously administered heparin in normal humans. *Blood* 1982; 60:1251-8

56. Estes JW, Poulin PF: Pharmacokinetics of heparin: Distribution and elimination. *Thrombos Diathes Haemorrh (Stuttg)* 1975; 33:26-37

57. Hull RD, Raskob GE, Hirsh J, Jay RM, Leclerc JR, Geerts WH, Rosenbloom D, Sackett DL, Anderson C, Harrison L, et al: Continuous intravenous heparin compared with intermittent subcutaneous heparin in the initial treatment of proximal-vein thrombosis. *N Engl J Med* 1986; 315:1109-14

58. Barzu T, van Rijn JL, Petitou M, Tobelem G, Caen JP: Heparin degradation in the endothelial cells. *Thromb Res* 1987; 47:601-9

59. Boneu B, Caranobe C, Cadroy Y, Dol F, Gabaig AM, Dupouy D, Sie P: Pharmacokinetic studies of standard unfractionated heparin, and low molecular weight heparins in the rabbit. *Semin Thromb Hemost* 1988; 14:18-27

60. Despotis GJ, Joist JH, Hogue CW, Alsoufiev A, Kater K, Goodnough LT, Santoro SA, Spitznagel E, Rosenblum M, Lappas DG: The impact of heparin concentration and activated clotting time monitoring on blood conservation: A prospective, randomized evaluation in patients undergoing cardiac operations. *J Thorac Cardiovasc Surg* 1995; 110:46-54

61. Despotis GJ, Levine V, Joist JH, Joiner-Maier D, Spitznagel E: Antithrombin III during cardiac surgery: Effect on response of activated clotting time to heparin and relationship to markers of hemostatic activation. *Anesth Analg* 1997; 85:498-506

62. Schwartz RS, Bauer KA, Rosenberg RD, Kavanaugh EJ, Davies DC, Bogdanoff DA: Clinical experience with antithrombin III concentrate in treatment of congenital and acquired deficiency of antithrombin. The Antithrombin III Study Group. *Am J Med* 1989; 87:53S-60S

63. Wolk LA, Wilson RF, Burdick M, Selik N, Brown J, Starricco A, Mammen, EF: Changes in antithrombin, antiplasmin, and plasminogen

during and after cardiopulmonary bypass. *Am Surgeon* 1985; 51:309-13

64. Hashimoto K, Yamagishi M, Sasaki T, Nakano M, Kurosawa H: Heparin and antithrombin III levels during cardiopulmonary bypass: Correlation with subclinical plasma coagulation. *Ann Thorac Surg* 1995; 58:799-805

65. Zaidan JR, Johnson S, Brynes R, Monroe S, Guffin AV: Rate of protamine administration: Its effect on heparin reversal and antithrombin recovery after coronary artery surgery. *Anesth Analg* 1986; 65:377-80

66. Irani MS: Antithrombin concentrates in heparin-resistant cardiopulmonary bypass patients. *Clin Appl Thromb/Hemostasis* 1996; 2:103-6

67. Dietrich W, Spannagl M, Schramm W, Vogt W, Barankay A, Richter JA: The influence of preoperative anticoagulation on heparin response during cardiopulmonary bypass. *J Thorac Cardiovasc Surg* 1991; 102:505-14

68. Esposito RA, Culliford AT, Colvin SB, Thomas SJ, Lackner H, Spencer, FC: Heparin resistance during cardiopulmonary bypass. The role of heparin pretreatment. *J Thorac Cardiovasc Surg* 1983; 85:346-53

69. Wu HF, Lundblad RL, Church FC: Neutralization of heparin activity by neutrophil lactoferrin. *Blood* 1995; 85:421-8

70. Lane DA, Pejler G, Flynn AM, Thompson EA, Lindahl U: Neutralization of heparin-related saccharides by histidine-rich glycoprotein and platelet factor 4. *J Biol Chem* 1986; 261:3980-6

71. Kelton JG, Hirsh J: Bleeding associated with antithrombotic therapy. *Semin Hematol* 1980; 17:259-91

72. Teoh KH, Young E, Bradley CA, Hirsh J: Heparin binding proteins. Contribution to heparin rebound after cardiopulmonary bypass. *Circulation* 1993; 88:420-5

73. Lane DA: Heparin binding and neutralization proteins, Heparin: Chemical and Biological Properties. Clinical Application. Edited by Lane D, Lindahl U. Boca Raton, CRC Press, 1989, pp 362

74. Preissner KT, Muller-Berghaus G: Neutralization and binding of heparin by S protein/vitronectin in the inhibition of factor Xa by antithrombin III. Involvement of an inducible heparin-binding domain of S protein/vitronectin. *J Biol Chem* 1987; 262:12247-53

75. Thomas DP, Barrowcliffe TW, Johnson EA: The influence of tissue source, salt and molecular weight and heparin activity. *Scand J Haematol Suppl* 1980; 36:40-9

76. Anderson EF: Heparin resistance prior to cardiopulmonary bypass. *ANESTHESIOLOGY* 1986; 64:504-7

77. Metz S, Keats AS: Low activated coagulation time during cardiopulmonary bypass does not increase postoperative bleeding. *Ann Thorac Surg* 1990; 49:440-4

78. Jobes DR, Schwartz AJ, Ellison N, Andrews R, Ruffini RA, Ruffini JJ: Monitoring heparin anticoagulation and its neutralization. *Ann Thorac Surg* 1980; 31:161-6

79. Kopriva CJ: The activated coagulation time (ACT), Effective Hemostasis in Cardiac Surgery. Edited by Ellison N, Jobes DR. Philadelphia, WB Saunders, 1988, pp 155-62

80. Gravlee GP, Case LD, Angert KC, Rogers AT, Miller GS: Variability of the activated coagulation time. *Anesth Analg* 1988; 67:469-72

81. Despotis GJ, Summerfield AL, Joist JH, Goodnough LT, Santoro SA, Spitznagel E, Cox JL, Lappas DG: Comparison of activated coagulation time and whole blood heparin measurements with laboratory plasma anti-Xa heparin concentration in patients having cardiac operations. *J Thorac Cardiovasc Surg* 1994; 108:1076-82

82. Cohen EJ, Cameriengo IJ, Dearing JP: Activated clotting times and cardiopulmonary bypass: I. The effect of hemodilution and hypothermia upon activated clotting time. *J Extracorp Tech* 1980; 12: 139-41
83. Stenbjerg S, Berg E, Albrechtsen OK: Heparin levels and activated clotting time (ACT) during open heart surgery. *Scand J Haematol* 1981; 26:281-4
84. Culliford AT, Gitel SN, Starr N, Thomas ST, Baumann FG, Wessler S, Spencer FC: Lack of correlation between activated clotting time and plasma heparin during cardiopulmonary bypass. *Ann Thorac Surg* 1981; 193:105-11
85. Gravlee GP: Anticoagulation for cardiopulmonary bypass, *Cardiopulmonary Bypass: Principles and Practice*. Edited by Gravlee GP, Utley, RF. Baltimore, Williams & Wilkins, 1993, pp 340-80
86. Moorehead MT, Westengard JC, Bull BS: Platelet involvement in the activated coagulation time of heparinized blood. *Anesth Analg* 1984; 63:394-8
87. Moliterno DJ, Califf RM, Aguirre FV, Anderson K, Sigmon KN, Weisman HF, Topol EJ: Effect of platelet glycoprotein IIb/IIIa integrin blockade on activated clotting time during percutaneous transluminal coronary angioplasty or directional atherectomy (the EPIC trial). Evaluation of c7E3 Fab in the Prevention of Ischemic Complications trial. *Am J Cardiol* 1995; 75:559-62
88. Wang JS, Lin CY, Hung WT, Karp RB: Monitoring of heparin-induced anticoagulation with kaolin-activated clotting time in cardiac surgical patients treated with aprotinin. *ANESTHESIOLOGY* 1992; 77:1080-4
89. Wendel HP, Heller W, Gallimore MJ, Bantel H, Muller-Beissenhirtz H, Hoffmeister HE: The prolonged activated clotting time (ACT) with aprotinin depends on the type of activator used for measurement. *Blood Coag Fibrinol* 1993; 4:41-5
90. Hunt BJ, Segal HC, Yacoub M: Guidelines for monitoring heparin by the activated clotting time when aprotinin is used during cardiopulmonary bypass. *J Thorac Cardiovasc Surg* 1992; 104:211-2
91. Wang JS, Lin CY, Karp RB: Comparison of high-dose thrombin time with activated clotting time for monitoring of anticoagulant effects of heparin in cardiac surgical patients. *Anesth Analg* 1994; 79: 9-13
92. Najman DM, Walenga JM, Fareed J, Pifarre R: Effects of aprotinin on anticoagulant monitoring: Implications in cardiovascular surgery. *Ann Thorac Surg* 1993; 55:662-6
93. Umlas J, Gauvin G, Taff R: Heparin monitoring and neutralization during cardiopulmonary bypass using a rapid plasma separator and a fluorometric assay. *Ann Thorac Surg* 1984; 37:301-3
94. Despotis GJ, Levine V, Joiner-Maier D, Joist JH: A comparison between continuous infusion versus standard bolus administration of heparin based on monitoring in cardiac surgery. *Blood Coagul Fibrinol* 1997; 8:419-30
95. Gravlee GP, Rogers AT, Dudas LM, Taylor R, Roy RC, Case LD, Triscott, M, Brown CW, Mark LJ, Cordell AR: Heparin management protocol for cardiopulmonary bypass influences postoperative heparin rebound but not bleeding. *ANESTHESIOLOGY* 1992; 76:393-401
96. Harloff M, Taraskiewicz, Fotouhi C: Comparison study of the hepcor system four and the hemostasis management system. *Perfusion* 1991; 6:297-301
97. Saleem A, Shenaq SS, Yawn DH, Harshberger K, Diemunsch P, Mohindra P: Heparin monitoring during cardiopulmonary bypass. *Ann Clin Lab Sci* 1984; 14:474-9
98. Wahr JA, Yun JH, Yang VC, Lee LM, Fu B, Meyerhoff ME: A new method of measuring heparin levels in whole blood by protamine titration using a heparin-responsive electrochemical sensor. *J Cardiothorac Vasc Anesth* 1996; 10:447-50
99. Despotis GJ, Joist JH, Goodnough LT, Santoro SA, Spitznagel E: Whole blood heparin concentration measurements by automated protamine titration agree with plasma anti-Xa measurements. *J Thorac Cardiovasc Surg* 1996; 170:611-3
100. Despotis GJ, Joist JH, Joiner-Maier D, Alsoufiev AL, Triantafyllou AN, Goodnough LT, Santoro SA, Lappas DG: Effect of aprotinin on activated clotting time, whole blood and plasma heparin measurements. *Ann Thorac Surg* 1995; 59:106-11
101. Hardy JF, Belisle S, Robitaille D, Perrault J, Roy M, Gagnon L: Measurement of heparin concentration in whole blood with the hepcor/HMS device does not agree with laboratory determination of plasma heparin concentration using a chromogenic substrate for activated factor X. *J Thorac Cardiovasc Surg* 1996; 112:154-61
102. Mitchell GA, Garguilo RJ, Huseby RM, Lawson DE, Pochron SP, Schuanes JA: Assay for plasma heparin using a synthetic peptide substrate for thrombin: Introduction of the fluorophore aminoisophthalic acid, dimethyl ester. *Thromb Res* 1978; 13:47-52
103. Umlas J, Taff RH, Gauvin G, Swierk P: Anticoagulant monitoring and neutralization during open heart surgery—a rapid method for measuring heparin and calculating safe reduced protamine doses. *Anesth Analg* 1983; 62:1095-9
104. Anido G, Freeman DJ: Heparin assay and protamine titration. *Am J Clin Pathol* 1981; 76:410-5
105. Slaughter TF, Grocott H, Greenblo K, Bennett-Guerrero E, Hilton A, Hodgins L, Mark JB: The heparin management Test (HMT<sup>®</sup>): An improved method for monitoring anticoagulation during cardiac surgery (abstract). *ANESTHESIOLOGY* 1997; 85:A148
106. Gibbs NM, Weightman WM, Thackray NM, Michalopoulos N: An evaluation of the TAS<sup>®</sup> heparin management test in cardiac surgical patients in vitro and in vivo (abstract). *Anesth Analg* 1997; 84:S236
107. Huyzen RJ, Harder MP, Huet RC, Boonstra PW, Brenken U, van Oeveren W: Alternative perioperative anticoagulation monitoring during cardiopulmonary bypass in aprotinin-treated patients. *J Cardiothorac Vasc Anesth* 1994; 8:153-6
108. Tabuchi N, Njo TL, Tigchelaar I, Huyzen RJ, Boonstra PW, van Oeveren W: Monitoring of anticoagulation in aprotinin-treated patients during heart operation. *Ann Thorac Surg* 1994; 58:774-7
109. Yang VC, Ma SC, Liu D, Brown RB, Meyerhoff ME: A novel electrochemical heparin sensor. *ASAIO J* 1993; 39:195-201
110. Yim HS, Kibbey CE, Ma SC, Kliza DM, Liu D, Park SB, Espadas Torre C, Meyerhoff ME: Polymer membrane-based ion-, gas- and bio-selective potentiometric sensors. *Biosens Bioelectron* 1993; 8:1-38
111. Yun JH, Lee LM, Wahr JA, Fu B, Meyerhoff ME, Yang VC: Clinical application of disposable heparin sensors. *Blood heparin measurements during open heart surgery. ASAIO J* 1995; 41:M661-4
112. Yin ET: A new single stage measurement of heparin by anti-factor Xa. *Sem Thromb Hemostas* 1985; 11:243-4
113. Bara L, Combe-Tamzali S, Conard J, Horellou MH, Samama M: Laboratory monitoring of a low molecular weight heparin (enoxaparin) with a new clotting test (Heptest). *Haemostasis* 1987; 17:127-33
114. Emanuele RM, Racanelli A, Fareed J: Pharmacokinetics of heparins differing in mean molecular weight using a Xa amidolytic and Heptest clotting method. *Ther Drug Monit* 1988; 10:153-9
115. Harenberg J, Giese C, Dempfle CE, Stehle G, Heene DL: Monitoring of heparin and low molecular weight heparin with capillary and venous whole blood. *Thromb Haemost* 1988; 60:377-81



## ANTICOAGULATION MONITORING DURING CARDIAC SURGERY

116. Harenberg J, Giese C, Dempfle CE, Stehle G, Heene DL: Biological activity and safety of the subcutaneous administration of high doses of low molecular weight heparin for 8 days in human volunteers. *Thromb Haemost* 1989; 61:357-62
117. Bara L, Mardiguian J, Samama M: In vitro effect on Hep-test of low molecular weight heparin fractions and preparations with various anti-IIa and anti-Xa activities. *Thromb Res* 1990; 57:585-92
118. Kristensen HI, Ostergaard PB, Nordfang O, Abildgaard U, Lindahl AK: Effect of tissue factor pathway inhibitor (TFPI) in the HEP-TEST assay and in an amidolytic anti factor Xa assay for LMW heparin. *Thromb Haemost* 1992; 68:310-4
119. Ireland HA, Boisclair MD, Lane DA, Thompson E, Curtis JR: Hemodialysis and heparin. Alternative methods of measuring heparin and of detecting activation of coagulation. *Clin Nephrol* 1991; 35: 26-33
120. Ozawa T, Domagalski J, Mammen EF: Determination of low-molecular-weight heparin by Hep-test on the automated coagulation laboratory system. *Am J Clin Pathol* 1993; 99:157-62
121. Despotis GJ, Levine V, Joist HJ, Santoro SA, Mendeloff E: Multiple episodes of thrombosis with biventricular support devices with inadequate anticoagulation and evidence of accelerated intravascular coagulation. *J Thorac Cardiovasc Surg* 1996; 112:538-40
122. Despotis GJ, Alsoufiev AL, Spitznagel E, Goodnough LT, Lappas DG: Response of kaolin ACT to heparin: Evaluation with an automated assay and higher heparin concentrations. *Ann Thorac Surg* 1996; 61: 795-9
123. Bull BS, Korpman RA, Huse WM, Briggs BD: Heparin therapy during extracorporeal circulation: I. Problems inherent in existing heparin protocols. *J Thorac Cardiovasc Surg* 1975; 69:674-84
124. Bull BS, Huse WM, Brauer FS, Korpman RA: Heparin therapy during extracorporeal circulation: II. The use of a dose-response curve to individualize heparin and protamine dosage. *J Thorac Cardiovasc Surg* 1975; 69:685-9
125. Jobes DR, Schaffer GW, Aitken GL: Increased accuracy and precision of heparin and protamine dosing reduces blood loss and transfusion in patients undergoing primary cardiac operations. *J Thorac Cardiovasc Surg* 1995; 110:36-45
126. Gundry SR, Drongowski RA, Klein MD, Coran AG: Postoperative bleeding in cardiovascular surgery. Does heparin rebound really exist? *Am Surgeon* 1989; 55:162-5
127. Shanberge JN, Murato M, Quattrocioni-Longe T, van Neste L: Heparin-protamine complexes in the production of heparin rebound and other complications of extracorporeal bypass procedures. *Am J Clin Pathol* 1987; 87:210-7
128. Pifarre R, Babka R, Sullivan HJ, Montoya A, Bakhos M, El-Etr A: Management of postoperative heparin rebound following cardiopulmonary bypass. *J Thorac Cardiovasc Surg* 1981; 81:378-81
129. Murray DJ, Brosnahan WJ, Pennell B, Kaplanski D, Weiler JM, Olson J: Heparin detection by the activated coagulation time: A comparison of the sensitivity of coagulation tests and heparin assays. *J Cardiothorac Vasc Anesth* 1997; 11:24-8
130. Schlueter AJ, Pennell BJ, Olson JD: Evaluation of a new protamine titration method to assay heparin in whole blood and plasma. *Am J Clin Pathol* 1997; 107:511-20
131. Baugh RF, Deemar KA, Zimmermann JJ: Heparinase in the activated clotting time assay: Monitoring heparin-independent alterations in coagulation function. *Anesth Analg* 1992; 74:201-5
132. Despotis GJ, Summerfield AL, Joist JH, Goodnough LT, Santoro SA, Zimmermann JJ, Lappas DG: In vitro reversal of heparin effect with heparinase: evaluation with whole blood prothrombin time and activated partial thromboplastin time in cardiac surgical patients. *Anesth Analg* 1994; 79:670-4
133. Verska JJ: Control of heparinization by activated clotting time during bypass with improved postoperative hemostasis. *Ann Thorac Surg* 1977; 24:170-3
134. Babka R, Colby C, El-Etr A, Pifarre R: Monitoring of intraoperative heparinization and blood loss following cardiopulmonary bypass surgery. *J Thorac Cardiovasc Surg* 1977; 73:780-2
135. Roth JA, Cukingnan RA, Scott CR: Use of activated coagulation time to monitor heparin during cardiac surgery. *Ann Thorac Surg* 1979; 28:69-72
136. Papaconstantinou C, Radegran K: Use of the activated coagulation time in cardiac surgery. Effects on heparin-protamine dosages and bleeding. *Scand J Thorac Cardiovasc Surg* 1981; 15:213-5
137. Jumeau HG, Sudah F: Monitoring of anticoagulant therapy during open-heart surgery in children with congenital heart disease. *Acta Haematol* 1983; 70:392-5
138. Ninikoski J, Laato M, Laaksonen V, Jalonen J, Inberg MV: Use of activated clotting time to monitor anticoagulation during cardiac surgery. *Scand J Thorac Cardiovasc Surg* 1984; 18:57-61
139. Lefemine AA, Lewis M: Activated clotting time for control of anticoagulation during surgery. *Am Surg* 1985; 51:274-8
140. Preiss DU, Schmidt-Bleibtreu H, Berguson P, Metz G: Blood transfusion requirements in coronary artery surgery with and without the activated clotting time (ACT) technique. *Klin Wochenschr* 1985; 63:252-6
141. Akl BF, Vargas GM, Neal J, Robillard J, Kelly P: Clinical experience with the activated clotting time for the control of heparin and protamine therapy during cardiopulmonary bypass. *J Thorac Cardiovasc Surg* 1980; 79:97-102
142. Dearing JP, Bartles DM, Stroud MR, Sade RM: Activated clotting times versus protocol anticoagulation management. *J Exp Corp Tech* 1998; 15:17-9
143. Sakurada T, Kikuchi Y, Koushima R, Nakashima S, Hachiro Y, Kagaya H: [Clinical evaluation of heparin concentration and activated clotting time monitoring (HEPCON HMS) system]. *Nippon Kyobu Geka Gakkai Zasshi* 1997; 45:836-40
144. Boldt J, Schindler E, Osmer C, Wittstock M, Stertmann WA, Hempelmann G: Influence of different anticoagulation regimens on platelet function during cardiac surgery. *Br J Anaesth* 1994; 73:639-44
145. Okita YO, Takamoto S, Ando M, Morota T, Yamaki F, Matsukawa R, Kawashima Y: Coagulation and fibrinolysis system in aortic surgery under deep hypothermic circulatory arrest with aprotinin: The importance of adequate heparinization. *Circulation* 1997; 96:376-81
146. Fernandez F, N'guyen P, Van Ryn J, Ofosu FA, Hirsh J, Buchanan MR: Hemorrhagic doses of heparin and other glycosaminoglycans induce a platelet defect. *Thromb Res* 1986; 43:491-5
147. Carr ME Jr, Carr SL: At high heparin concentrations, protamine concentrations which reverse heparin anticoagulant effects are insufficient to reverse heparin anti-platelet effects. *Thromb Res* 1994; 75: 617-30
148. John LC, Rees GM, Kovacs IB: Different anticoagulants and platelet reactivity in cardiac surgical patients. *Ann Thorac Surg* 1993; 56:899-902
149. Berger RL, Ramaswamy K, Ryan TJ: Reduced protamine dosage for heparin neutralization in open-heart operations. *Circulation* 1968; 37:II154-7
150. Guffin AV, Dunbar RW, Kaplan JA, Bland JW Jr: Successful use



of a reduced dose of protamine after cardiopulmonary bypass. *Anesth Analg* 1976; 55:110-3

151. Moriau M, Masure R, Hurler A, Debeys C, Chaland C, Ponlot R, Jaumain P, Servaye-Kestens Y, Ravoux A, Louis A, Goenen M: Haemostasis disorders in open heart surgery with extracorporeal circulation. Importance of the platelet function and the heparin neutralization. *Vox Sanguinis* 1977; 32:41-51

152. Ottesen S, Stormorken H, Hatteland K: The value of activated coagulation time in monitoring heparin therapy during extracorporeal circulation. *Scand J Thorac Cardiovasc Surg* 1984; 18:123-8

153. Keeler JF, Shah MV, Hansbro SD: Protamine—the need to determine the dose. Comparison of a simple protamine titration method with an empirical dose regimen for reversal of heparinisation following cardiopulmonary bypass. *Anaesthesia* 1991; 46:925-8

154. Shore-Lesserson L, Reich DL, DePerio M: Heparin and protamine titration do not improve haemostasis in cardiac surgical patients. *Can J Anaesth* 1998; 45:10-8

155. Shastri KA, Logue GL, Stern MP, Raza S, O'Connor BM, Bovill JJ, Hoover EL: Neutrophil lactoferrin release during open heart surgery is unrelated to complement activation. *ASAIO J* 1994; 40:56-61

156. Moorman RM, Zapol WM, Lowenstein E: Neutralization of heparin anticoagulation. *Cardiopulmonary Bypass: Principles and Practice*. Edited by Gravlee GP. Baltimore, Williams & Wilkins, 1993, pp 381-2

157. Addonizio VP Jr, Fisher CA, Kappa JR, Ellison N: Prevention of heparin-induced thrombocytopenia during open heart surgery with iloprost (ZK36374). *Surgery* 1987; 102:796-807

158. Dehmer GJ, Lange RA, Tate DA, Pirwitz M, Daniel W, Fisher M, Bonnem EM: Randomized trial of recombinant platelet factor 4 versus protamine for the reversal of heparin anticoagulation in humans. *Circulation* 1996; 94:II347-52

159. Levy JH, Cormack JG, Morales A: Heparin neutralization by recombinant platelet factor 4 and protamine. *Anesth Analg* 1995; 81:35-7

160. Michelsen LG, Kikura M, Levy JH, Lee MK, Lee KC, Zimmermann JJ, Szlam F: Heparinase I (neutralase) reversal of systemic anticoagulation. *ANESTHESIOLOGY* 1996; 85:339-46

161. Kelsey PR, Bottomley J, Grotte GJ, Maciver JE: Congenital factor XII deficiency: Successful open heart surgery and anticoagulation. *Clin Lab Haematol* 1985; 7:379-81

162. Candio J, Prager D: Cardiopulmonary bypass and Factor XII deficiency. *Pa Med* 1981; 84:40

163. Wallock M, Arentzen C, Perkins J: Factor XII deficiency and cardiopulmonary bypass. *Perfusion* 1995; 10:13-6

164. Moorman RM, Reynolds DS, Comunale ME: Management of cardiopulmonary bypass in a patient with congenital factor XII deficiency. *J Cardiothorac Vasc Anesth* 1993; 7:452-4

165. Salmenpera M, Rasi V, Mattila S: Cardiopulmonary bypass in a patient with factor XII deficiency. *ANESTHESIOLOGY* 1991; 75:539-41

166. O'Neill WW, Weintraub R, Grines CL, Meany TB, Brodie BR, Friedman HZ, Ramos RG, Gangadharan V, Levin RN, Choksi N, et al: A prospective, placebo-controlled, randomized trial of intravenous streptokinase and angioplasty versus lone angioplasty therapy of acute myocardial infarction. *Circulation* 1992; 86:1710-7

167. Burman JF, Chung HI, Lane DA, Philippou H, Adami A, Lincoln JC: Role of factor XII in thrombin generation and fibrinolysis during cardiopulmonary bypass. *Lancet* 1994; 344:1192-3

168. Wood MK: Congenital factor XII deficiency and cardiopulmonary bypass. *Ann Thorac Surg* 1994; 58:1565

169. Gerhardt MA, Greenberg CS, Slaughter TF, Stafford Smith M: Factor XII deficiency and cardiopulmonary bypass: Use of a novel modification of the activated clotting time to monitor anticoagulation. *ANESTHESIOLOGY* 1997; 87:990-2

170. Nawabi IU, Garcia A, Mitter A, Brunner RE: Anticoagulation during CABG in factor XI deficiency, a case report. *Thromb Haemost* 1994; 71:261

171. Sheikh F, Lechowicz A, Setlur R, Rauch A, Dunn H: Recognition and management of patients with antiphospholipid antibody syndrome undergoing cardiac surgery. *J Cardiothorac Vasc Anesth* 1997; 11:764-6

172. Ducart AR, Collard EL, Osselaer JC, Broka SM, Eucher PM, Joucken KL: Management of anticoagulation during cardiopulmonary bypass in a patient with a circulating lupus anticoagulant. *J Cardiothorac Vasc Anesth* 1997; 11:878-9

173. Andrew M, MacIntyre B, MacMillan J, Williams WG, Gruenwald C, Johnston M, Burrows F, Wang E, Adams M: Heparin therapy during cardiopulmonary bypass in children requires ongoing quality control. *Thromb Haemost* 1993; 70:937-41

174. Chan AK, Leaker M, Burrows FA, Williams WG, Gruenwald CE, Whyte L, Adams M, Brooker LA, Adams H, Mitchell L, Andrew M: Coagulation and fibrinolytic profile of paediatric patients undergoing cardiopulmonary bypass. *Thromb Haemost* 1997; 77:270-7

175. Andrew M, Vegh P, Johnston M, Bowker J, Ofosu F, Mitchell L: Maturation of the hemostatic system during childhood. *Blood* 1992; 80:1998-2005

176. Turner Gomes SO, Nitschmann EP, Norman GR, Andrew ME, Williams WG: Effect of heparin loading during congenital heart operation on thrombin generation and blood loss. *Ann Thorac Surg* 1997; 63:482-8

177. D'Errico C, Shayevitz JR, Martindale SJ: Age-related differences in heparin sensitivity and heparin-protamine interactions in cardiac surgery patients. *J Cardiothorac Vasc Anesth* 1996; 10:451-7

178. Sellevold OF, Berg TM, Rein KA, Levang OW, Iversen OJ, Bergh K: Heparin-coated circuit during cardiopulmonary bypass. A clinical study using closed circuit, centrifugal pump and reduced heparinization. *Acta Anaesthesiol Scand* 1994; 38:372-9

179. Ovrum E, Mollnes TE, Fosse E, Holen EA, Tangen G, Ringdal MA, Videm V: High and low heparin dose with heparin-coated cardiopulmonary bypass: Activation of complement and granulocytes. *Ann Thorac Surg* 1995; 60:1755-61

180. Fukutomi M, Kobayashi S, Niwaya K, Hamada Y, Kitamura S: Changes in platelet, granulocyte, and complement activation during cardiopulmonary bypass using heparin-coated equipment. *Artif Organs* 1996; 20:767-76

181. Gu YJ, van Oeveren W, Akkerman C, Boonstra PW, Huyzen RJ, Wildevuur CR: Heparin-coated circuits reduce the inflammatory response to cardiopulmonary bypass. *Ann Thorac Surg* 1993; 55:917-22

182. Fosse E, Moen O, Johnson E, Semb G, Brockmeier V, Mollnes TE, Fagerhol MK, Venge P: Reduced complement and granulocyte activation with heparin-coated cardiopulmonary bypass. *Ann Thorac Surg* 1994; 58:472-7

183. Ovrum E, Mollnes TE, Fosse E, Holen EA, Tangen G, Abdelnoor M, Ringdal MA, Oystese R, Venge P: Complement and granulocyte activation in two different types of heparinized extracorporeal circuits. *J Thorac Cardiovasc Surg* 1995; 110:1623-32

184. Pekna M, Hagman L, Halden E, Nilsson UR, Nilsson B, Thelin S: Complement activation during cardiopulmonary bypass: Effects of immobilized heparin. *Ann Thorac Surg* 1994; 58:421-4

## ANTICOAGULATION MONITORING DURING CARDIAC SURGERY

185. Ovrum E, Fosse E, Molnes TE, Am Holen E, Tangen G, Abdelnoor M, Ringdal MA, Oystese R, Venge P: Complete heparin-coated cardiopulmonary bypass and low heparin dose reduce complement and granulocyte activation. *Eur J Cardiothorac Surg* 1996; 10:54-60
186. Steinberg BM, Grossi EA, Schwartz DS, McLoughlin DE, Aguinaga M, Bizakis C, Greenwald J, Flisser A, Spencer FC, Galloway AC: Heparin bonding of bypass circuits reduces cytokine release during cardiopulmonary bypass. *Ann Thorac Surg* 1995; 60:525-9
187. Aldea GS, Doursounian M, O'Gara P, Treanor P, Shapira OM, Lazar HL, Shemin RJ: Heparin-bonded circuits with a reduced anticoagulation protocol in primary CABG: A prospective, randomized study. *Ann Thorac Surg* 1996; 62:410-7
188. Shapira OM, Aldea GS, Zelingher J, Volpe C, Fitzgerald C, DeAndrade K, Lazar HL, Shemin RJ: Enhanced blood conservation and improved clinical outcome after valve surgery using heparin-bonded cardiopulmonary bypass circuits. *J Card Surg* 1996; 11:307-17
189. Aldea GS, Shapira OM, Treanor PR, Lazar HL, Shemin RJ: Effective use of heparin-bonded circuits and lower anticoagulation for coronary artery bypass grafting in Jehovah's Witnesses. *J Card Surg* 1996; 11:12-7
190. von Segesser LK, Weiss BM, Pasic M, Garcia E, Turina MI: Risk and benefit of low systemic heparinization during open heart operations. *Ann Thorac Surg* 1994; 58:391-8
191. Borowiec J, Thelin S, Bagge L, Hultman J, Hansson HE: Decreased blood loss after cardiopulmonary bypass using heparin-coated circuit and 50% reduction of heparin dose. *Scand J Thorac Cardiovasc Surg* 1992; 26:177-85
192. Kuitunen AH, Heikkila LJ, Salmenpera MT: Cardiopulmonary bypass with heparin-coated circuits and reduced systemic anticoagulation. *Ann Thorac Surg* 1997; 63:438-44
193. Boonstra PW, Gu YJ, Akkerman C, Haan J, Huyzen R, van Oeveren W: Heparin coating of an extracorporeal circuit partly improves hemostasis after cardiopulmonary bypass. *J Thorac Cardiovasc Surg* 1994; 107:289-92
194. Wagner WR, Johnson PC, Thompson KA, Marrone GC: Heparin-coated cardiopulmonary bypass circuits: Hemostatic alterations and postoperative blood loss. *Ann Thorac Surg* 1994; 58:734-40
195. Gorman RC, Ziats N, Rao AK, Gikakis N, Sun L, Khan MM, Stenach N, Sapatnekar S, Chouhan V, Gorman JH III, Niewiarowski S, Colman RW, Anderson JM, Edmunds LH Jr: Surface-bound heparin fails to reduce thrombin formation during clinical cardiopulmonary bypass. *J Thorac Cardiovasc Surg* 1996; 111:1-11
196. Borowiec J, Thelin S, Bagge L, van der Linden J, Thorno E, Hansson HE: Heparin-coated cardiopulmonary bypass circuits and 25% reduction of heparin dose in coronary artery surgery—A clinical study. *Ups J Med Sci* 1992; 97:55-66
197. Bick RL: Hemostasis defects associated with cardiac surgery, prosthetic devices, and other extracorporeal circuits. *Sem Thromb Hemost* 1985; 11:249-80
198. Ovrum E, Brosstad F, Am Holen E, Tangen G, Abdelnoor M, Oystese R: Complete heparin-coated (CBAS) cardiopulmonary bypass and reduced systemic heparin dose; Effects on coagulation and fibrinolysis. *Eur J Cardiothorac Surg* 1996; 10:449-55
199. Ovrum E, Brosstad F, Am Holen E, Tangen G, Abdelnoor M: Effects on coagulation and fibrinolysis with reduced versus full systemic heparinization and heparin-coated cardiopulmonary bypass. *Circulation* 1995; 92:2579-84
200. te Velthuis H, Baufreron C, Jansen PG, Thijs CM, Hack CE, Sturk A, Wildevuur CR, Loisanse DY: Heparin coating of extracorporeal circuits inhibits contact activation during cardiac operations. *J Thorac Cardiovasc Surg* 1997; 114:117-22
201. Bannan S, Danby A, Cowan D, Ashraf S, Martin PG: Low heparinization with heparin-bonded bypass circuits: Is it a safe strategy? *Ann Thorac Surg* 1997; 63:663-8
202. Muehrcke DD, McCarthy PM, Stewart RW, Seshagiri S, Ogella DA, Foster RC, Cosgrove DM: Complications of extracorporeal life support systems using heparin-bound surfaces. The risk of intracardiac clot formation. *J Thorac Cardiovasc Surg* 1995; 110:843-51
203. Cheung AT, Levin SK, Weiss SJ, Acker MA, Stenach N: Intracardiac thrombus: A risk of incomplete anticoagulation for cardiac operations. *Ann Thorac Surg* 1994; 58:541-2
204. Edmunds LH Jr: Surface-bound heparin—Panacea or peril? *Ann Thorac Surg* 1994; 58:285-6
205. Royston D: High-dose aprotinin therapy: A review of the first five years' experience. *J Cardiothorac Vasc Anesth* 1992; 6:76-100
206. Fritz H, Wunderer G: Biochemistry and applications of aprotinin, the kallikrein inhibitor from bovine organs. *Arzneimittelforschung* 1983; 33:479-94
207. Laurel MT, Ratnoff OD, Everson B: Inhibition of the activation of Hageman factor (factor XII) by aprotinin (Trasylol). *J Lab Clin Med* 1992; 119:580-5
208. Harke H, Gennrich M: Aprotinin-ACD-blood: I. Experimental studies on the effect of aprotinin on the plasmatic and thrombocytic coagulation. *Anaesthesist* 1980; 29:266-76
209. Dietrich W, Diltthey G, Spannagl M, Jochum M, Braun SL, Richter JA: Influence of high-dose aprotinin on anticoagulation, heparin requirement, and celite- and kaoli-activated clotting time in heparin-pretreated patients undergoing open-heart surgery. *ANESTHESIOLOGY* 1995; 83:679-89
210. Despotis GJ, Filos KS, Levine V, Alsoufiev A, Spitznagel E: Aprotinin prolongs activated and nonactivated whole blood clotting time and potentiates the effect of heparin in vitro. *Anesth Analg* 1996; 82:1126-31
211. Chabbat J, Porte P, Tellier M, Steinbuch M: Aprotinin is a competitive inhibitor of the factor VIIa-tissue factor complex. *Thromb Res* 1993; 71:205-15
212. Marx G, Pokar H, Reuter H, Doering V, Tilsner V: The effects of aprotinin on hemostatic function during cardiac surgery. *J Cardiothorac Vasc Anesth* 1991; 5:467-74
213. Espana F, Estelles A, Griffin JH, Aznar J, Gilabert J: Aprotinin (trasylo) is a competitive inhibitor of activated protein C. *Thromb Res* 1989; 56:751-6
214. Sweeney JD, Blair AJ, Dupuis MP, King TC, Moulton AL: Aprotinin, cardiac surgery, and factor V Leiden. *Transfusion* 1997; 37:1173-8
215. Sundt TM, Kouchoukos NT, Saffitz JE, Murphy SF, Wareing TH, Stahl DJ: Renal dysfunction and intravascular coagulation with aprotinin and hypothermic circulatory arrest. *Ann Thorac Surg* 1993; 55:1418-24
216. Cosgrove DM, Heric B, Lytle BW, Taylor PC, Novoa R, Golding LA, Stewart RW, McCarthy PM, Loop FD: Aprotinin therapy for reoperative myocardial revascularization: A placebo-controlled study. *Ann Thorac Surg* 1992; 54:1031-8
217. Laub GW, Riebmman JB, Chen C, Adkins MS, Anderson WA, Fernandez J, McGrath LB: The impact of aprotinin on coronary artery bypass graft patency. *Chest* 1994; 106:1370-5
218. Wang JS, Lin CY, Hung WT, Thisted RA, Karp RB: In vitro

effects of aprotinin on activated clotting time measured with different activators. *J Thorac Cardiovasc Surg* 1992; 104:1135-40

219. Jesty J, Morrison SA: The activation of Factor IX by tissue factor-Factor VII in a bovine plasma system lacking Factor X. *Thromb Res* 1983; 32:171-81

220. Feindt P, Volkmer I, Seyfert U, Huwer H, Kalweit G, Gams E: Activated clotting time, anticoagulation, use of heparin, and thrombin activation during extracorporeal circulation: changes under aprotinin therapy. *Thorac Cardiovasc Surg* 1993; 41:9-15

221. de Smet AA, Joen MC, van Oeveren W, Roozendaal KJ, Harder MP, Eijssman L, Wildevuur CR: Increased anticoagulation during cardiopulmonary bypass by aprotinin. *J Thorac Cardiovasc Surg* 1990; 100: 520-7

222. Hunt BJ, Segal H, Yahoub M: Aprotinin and heparin monitoring during cardiopulmonary bypass. *Circulation* 1992; 86II:410-2

223. Westaby S: Aprotinin in perspective. *Ann Thorac Surg* 1993; 55:1033-41

224. Dietrich W, Jochum M: Effect of celite and kaolin on activated clotting time in the presence of aprotinin: Activated clotting time is reduced by binding of aprotinin to kaolin. *J Thorac Cardiovasc Surg* 1995; 109:177-8

225. Francis JL, Howard C: The effect of aprotinin on the response of the activated partial thromboplastin time (APTT) to heparin. *Blood Coagul Fibrinol* 1993; 4:35-40

226. John LC, Rees GM, Kovacs IB: Reduction of heparin binding to and inhibition of platelets by aprotinin. *Ann Thorac Surg* 1993; 55: 1175-9

227. Sundaram S, Gikakis N, Hack CE, Niewiarowski S, Edmunds LH, Koneti Rao A, Sun L, Cooper SL, Colman RW: Nafamostat mesilate, a broad spectrum protease inhibitor, modulates platelet, neutrophil and contact activation in simulated extracorporeal circulation. *Thromb Haemostas* 1996; 75:76-82

228. Levy JH, Despotis GJ, Olson PJ, Weisinger A, Szlam F: Transgenically produced recombinant human ATIII enhances the antithrombotic effects of heparin in patients undergoing cardiac surgery (abstract). *Blood* 1997; 90:298

229. Teoh KH, Christakis GT, Weisel RD, Madonik MM, Ivanov J, Wong PY, Mee AV, Levitt D, Benak A, Reilly P, et al: Blood conservation with membrane oxygenators and dipyridamole. *Ann Thorac Surg* 1987; 44:40-7

230. Fish KJ, Sarnquist FH, van Steennis C, Mitchell RS, Hilberman M, Jamieson SW, Linet OI, Miller DC: A prospective, randomized study of the effects of prostacyclin on platelets and blood loss during coronary bypass operations. *J Thorac Cardiovasc Surg* 1986; 91:436-42

231. DiSesa VJ, Huval W, Lelcuk S, Jonas R, Maddi R, Lee-Son S, Shemin RJ, Collins JJ Jr, Hechtman HB, Cohn LH: Disadvantages of prostacyclin infusion during cardiopulmonary bypass: A double-blind study of 50 patients having coronary revascularization. *Ann Thorac Surg* 1984; 38:514-9

232. Long RW: Management of patients with heparin-induced thrombocytopenia requiring cardiopulmonary bypass. *J Thorac Cardiovasc Surg* 1985; 89:950-1

233. Smith JP, Walls JT, Muscato MS, McCord ES, Worth ER, Curtis JJ, Silver D: Extracorporeal circulation in a patient with heparin-induced thrombocytopenia. *ANESTHESIOLOGY* 1985; 62:363-5

234. Makhoul RG, McCann RL, Austin EH, Greenberg CS, Lowe JE: Management of patients with heparin-associated thrombocytopenia and thrombosis requiring cardiac surgery. *Ann Thorac Surg* 1987; 43:617-21

235. Shorten G, Comunale ME, Johnson RG: Management of cardiopulmonary bypass in a patient with heparin-induced thrombocytopenia using prostaglandin E1 and aspirin. *J Cardiothorac Vasc Anesth* 1994; 8:556-8

236. Collier BS, Anderson K, Weisman HF: New antiplatelet agents: Platelet GPIIb/IIIa antagonists. *Thromb Haemost* 1995; 74:302-8

237. Shigeta O, Glusko P, Downing SW, Lu W, Niewiarowski S, Edmunds LH Jr: Protection of platelets during long-term extracorporeal membrane oxygenation in sheep with a single dose of a disintegrin. *Circulation* 1992; 86:II398-404

238. Suzuki Y, Miyamoto S, Niewiarowski S, Edmunds LH: Integrelin prevents prolonged bleeding times after cardiopulmonary bypass (abstract). *Ann Thorac Surg* 1998; 66

239. Despotis GJ, Ikonomakou S, Levine V, Joiner-Maier D, Santoro SA, Joist JH: Effects of platelets and white blood cells and antiplatelet agent c7E3 (Reopro<sup>®</sup>) on a new test of PAF procoagulant activity of whole blood. *Thromb Res* 1997; 86:205-19

240. Ammar T, Scudder LE, Collier BS: In vitro effects of the platelet glycoprotein IIb/IIIa receptor antagonist c7E3 Fab on the activated clotting time. *Circulation* 1997; 95:614-7

241. Collier BS, Anderson K, Weisman HF: New antiplatelet agents: Platelet GPIIb/IIIa antagonists. *Thromb Haemost* 1995; 74:302-8

242. Gallistl S, Muntean W, Leis HJ: Effects of heparin and hirudin on thrombin generation and platelet aggregation after intrinsic activation of platelet rich plasma. *Thromb Haemost* 1995 Oct 1996; 74: 1163-8

243. Uchiyama S, Stropp JQ, Claypool DA, Didisheim P, Dewanjee MK: Filter bleeding time: a new in vitro test of hemostasis: I. Evaluation in normal and thrombocytopenic subjects. *Thromb Res* 1983; 31:99-115

244. Kratzer MA, Born GV: Simulation of primary haemostasis in vitro. *Haemostasis* 1985; 15:357-62

245. Greilich PE, Carr ME Jr, Carr SL, Chang AS: Reductions in platelet force development by cardiopulmonary bypass are associated with hemorrhage. *Anesth Analg* 1995; 80:459-65

246. Greilich PE, Carr ME, Zekert SL, Dent RM: Quantitative assessment of platelet function and clot structure in patients with severe coronary artery disease. *Am J Med Sci* 1994; 307:15-20

247. Mongan PD, Hosking MP: The role of desmopressin acetate in patients undergoing coronary artery bypass surgery. A controlled clinical trial with thromboelastographic risk stratification. *ANESTHESIOLOGY* 1992; 77:38-46

248. Greilich PE, Alving BM, O'Neill KL, Chang AS, Reid TJ: A modified thromboelastographic method for monitoring c7E3 Fab in heparinized patients. *Anesth Analg* 1997; 84:31-8

249. Saleem A, Blifeld C, Saleh SA, Yawn DH, Mace ML, Schwartz M, Crawford ES: Viscoelastic measurement of clot formation: A new test of platelet function. *Ann Clin Lab Sci* 1983; 13:115-24

250. Collier BS, Lang D, Scudder LE: Rapid and simple platelet function assay to assess glycoprotein IIb/IIIa receptor blockade. *Circulation* 1997; 95:860-6

251. Despotis GJ, Levine V, Filos KS, Santoro SA, Joist JH, Spitznagel E, Goodnough LT: Evaluation of a new, point-of-care test that measures PAF-mediated acceleration of coagulation in cardiac surgical patients. *ANESTHESIOLOGY* 1996; 85:1311-23

252. Despotis GJ, Levine V, Saleem R, Joist JH: Use of point-of-care test in identification of patients who can benefit from desmopressin during cardiac surgery: A randomised controlled trial. *Lancet* 1999; 354:106-10



## ANTICOAGULATION MONITORING DURING CARDIAC SURGERY

253. Ereth MH, Nuttall GA, Grubba RN: Platelet retention glass bead assay predicts blood loss after cardiac surgery (abstract). *Anesth Analg* 1998; 86
254. Mascelli MA, Worley S, Veriabo NJ, Lance ET, Mack S, Schaible T, Weisman HF, Jordan RE: Rapid assessment of platelet function with a modified whole-blood aggregometer in percutaneous transluminal coronary angioplasty patients receiving anti-GP IIb/IIIa therapy. *Circulation* 1997; 96:3860-6
255. Oltrona L, Eisenberg PR, Lasala JM, Sewall DJ, Shelton ME, Winters KJ: Association of heparin-resistant thrombin activity with acute ischemic complications of coronary interventions. *Circulation* 1996; 94:2064-71
256. Eisenberg PR, Siegel JE, Abendschein DR, Miletich JP: Importance of Factor Xa in determining the procoagulant activity of whole-blood clots. *J Clin Invest* 1993; 91:1877-83
257. Brister SJ, Buchanan MR: Heparinless cardiopulmonary bypass revisited: A newer strategy to avoid heparin-related bleeding using dermatan sulfate. *J Cardiothorac Vasc Anesth* 1995; 9:317-21
258. Bagge L, Holmer E, Wahlberg T, Nystrom SO, Tyden H: Fragmin (LMWH) vs heparin for anticoagulation during in vitro recycling of human blood in cardiopulmonary bypass circuits: Dose-dependence and mechanisms of clotting. *Blood Coagul Fibrinol* 1994; 5:273-80
259. Henny CP, Ten Cate H, Ten Cate JW, Moulijn AC, Sie TH, Warren P, Buller HR: A randomized blind study comparing standard heparin and a new low molecular weight heparinoid in cardiopulmonary bypass surgery in dogs. *J Lab Clin Med* 1985; 106:187-96
260. Stiekema JC, Wijnand HP, Van Dinther TG, Moelker HC, Dawes J, Vincenzo A, Toeberich H: Safety and pharmacokinetics of the low molecular weight heparinoid Org 10172 administered to healthy elderly volunteers. *Br J Clin Pharmacol* 1989; 27:39-48
261. Ortel TL, Gockerman JP, Califf RM, McCann RL, O'Connor CM, Metzler DM, Greenberg CS: Parenteral anticoagulation with the heparinoid Lomoparan (Org 10172) in patients with heparin induced thrombocytopenia and thrombosis. *Thromb Haemost* 1992; 67:292-6
262. Doherty DC, Ortel TL, de Bruijn N, Greenberg CS, Van Trigt P, 3d: "Heparin-free" cardiopulmonary bypass: First reported use of heparinoid (Org 10172) to provide anticoagulation for cardiopulmonary bypass. *ANESTHESIOLOGY* 1990; 73:562-5
263. Magnani HN: Heparin-induced thrombocytopenia (HIT): An overview of 230 patients treated with orgaran (Org 10172). *Thromb Haemost* 1993; 70:554-61
264. Ganjoo AK, Harloff MG, Johnson WD: Cardiopulmonary bypass for heparin-induced thrombocytopenia: Management with a heparin-bonded circuit and enoxaparin. *J Thorac Cardiovasc Surg* 1996; 112:1390-2
265. Robitaille D, Leclerc JR, Laberge R, Sahab P, Atkinson S, Cartier R: Cardiopulmonary bypass with a low-molecular-weight heparin fraction (enoxaparin) in a patient with a history of heparin-associated thrombocytopenia. *J Thorac Cardiovasc Surg* 1992; 103:597-9
266. Wakefield TW, Andrews PC, Wroblewski SK, Kadell AM, Tejwani S, Hulin MS, Stanley JC: A [+18RGD] protamine variant for nontoxic and effective reversal of conventional heparin and low-molecular-weight heparin anticoagulation. *J Surg Res* 1996; 63:280-6
267. Teasdale SJ, Zulys VJ, Mycyk T, Baird RJ, Glynn MF: Ancrod anticoagulation for cardiopulmonary bypass in heparin-induced thrombocytopenia and thrombosis. *Ann Thorac Surg* 1989; 48:712-3
268. O-Yurvati AH, Laub GW, Southgate TJ, McGrath LB: Heparinless cardiopulmonary bypass with ancrod. *Ann Thorac Surg* 1994; 57:1656-8
269. Sane DC, Gresalfi NJ, Enney-O'Mara LA, Califf RM, Greenberg CS, Bovill EG, Oberhardt BJ: Exploration of rapid bedside monitoring of coagulation and fibrinolysis parameters during thrombolytic therapy. *Blood Coagul Fibrinol* 1992; 3:47-54
270. Walenga JM, Bakhos M, Messmore HL, Fareed J, Pifarre R: Potential use of recombinant hirudin as an anticoagulant in a cardiopulmonary bypass model. *Ann Thorac Surg* 1991; 51:271-7
271. Riess FC, Lower C, Seelig C: Recombinant hirudin as a new anticoagulant during cardiac operations instead of heparin: Successful for aortic valve replacement in man. *J Thorac Cardiovasc Surg* 1995; 110:265-7
272. Riess FC, Potzsch B, Bader R: A case report on the use of recombinant hirudin as an anticoagulant for cardiopulmonary bypass in open-heart surgery. *Eur J Cardiothorac Surg* 1996; 10:386-8
273. Matsuo T, Kario K, Chikahira Y, Nakao K, Yamada T: Treatment of heparin-induced thrombocytopenia by use of argatroban, a synthetic thrombin inhibitor. *Br J Haematol* 1992; 82:627-9
274. Chomiak PN, Walenga JM, Koza MJ, Reilly TM, Turlapathy P, Pifarre R: Investigation of a thrombin inhibitor peptide as an alternative to heparin in cardiopulmonary bypass surgery. *Circulation* 1993; 88:407-12
275. DeAnda A Jr, Coutre S, Miller DC: Synthetic peptide thrombin inhibitor. *Circulation* 1994; 90:1581-2
276. Koster A, Kuppe H, Hetzer R, Sodian R, Crystal GJ, Mertzluft F: Emergent cardiopulmonary bypass in five patients with heparin-induced thrombocytopenia Type II employing recombinant hirudin. *ANESTHESIOLOGY* 1999; 89:777-80
277. Potzsch B, Madlener K, Seelig C, Riess CF, Greinacher A, Muller Berghaus G: Monitoring of r-hirudin anticoagulation during cardiopulmonary bypass—assessment of the whole blood ecarin clotting time. *Thromb Haemost* 1997; 77:920-5
278. Preiss DU, Schneider Y, Scholz ME, Obolenski S, Slivin O: Pentosanpolysulfate (PPS) an alternative anticoagulant for cardiopulmonary bypass in heart surgery (abstract). *Anesth Analg* 1997; 84:105
279. Schneider Y, Obolenski S, Preiss DU, Scholz ME: Pentoanpoly-sulfate (PPS), a substitute for heparin in extracorporeal circulation (ECC) (abstract)? *Acta Anaesth Scand* 1997; 40:221
280. Lenting PJ, Meijerman DWE, Clijsters PPFM, Mertens K: A novel antithrombotic strategy based on inhibitors of factor VIII-factor IX complex assembly (abstract). *Thromb Haemostas* 1997; 77:689
281. Vlasuk GP, Ramjit D, Fujita T, Dunwiddie CT, Nutt EM, Smith DE, Shebuski RJ: Comparison of the in vivo anticoagulant properties of standard heparin and the highly selective factor Xa inhibitors antistasin and tick anticoagulant peptide (TAP) in a rabbit model of venous thrombosis. *Thromb Haemost* 1991; 65:257-62
282. Kristensen AT, Ezben M, Villumsen A, Groes L, Elm T, Hedner U: The effect of simultaneous administration of aspirin, heparin and the FFR-ck-active-site inhibited rFVIIa on nail cuticle bleeding in rabbits (abstract). *Thromb Haemostas* 1997; 77:688
283. Mammen EF, Koets MH, Washington BC, Wolk LW, Brown JM, Burdick M, Selik NR, Wilson RF: Hemostasis changes during cardiopulmonary bypass surgery. *Sem Thromb Hemost* 1985; 11:281-92
284. Bick RL: Alterations of hemostasis associated with malignancy: Etiology, pathophysiology, diagnosis and management. *Sem Thromb Hemost* 1978; 5:1-26
285. Clark RE, Beauchamp RA, Magrath RA, Brooks JD, Ferguson TB, Weldon CS: Comparison of bubble and membrane oxygenators in short and long perfusions. *J Thorac Cardiovasc Surg* 1979; 78:655-66
286. Journois D, Mauriat P, Pouard P, Marchot P, Amiral J, Safran D:



Assessment of coagulation factor activation during cardiopulmonary bypass with a new monoclonal antibody. *J Cardiothorac Vasc Anesth* 1994; 8:157-61

287. Gelb AB, Roth RI, Levin J, London MJ, Noall RA, Hauck WW, Cloutier M, Verrier E, Mangano DT: Changes in blood coagulation during and following cardiopulmonary bypass: Lack of correlation with clinical bleeding. *Am J Clin Pathol* 1996; 106:87-99

288. Axford TC, Dearani JA, Ragno G, MacGregor H, Patel MA, Valeri CR, Khuri SF: Safety and therapeutic effectiveness of reinfused shed blood after open heart surgery. *Ann Thorac Surg* 1994; 57:615-22

289. Boldt J, Schindler E, Knothe C, Hammermann H, Stertmann WA, Hempelmann G: Does aprotinin influence endothelial-associated coagulation in cardiac surgery? *J Cardiothorac Vasc Anesth* 1994; 8:527-31

290. Boldt J, Zickmann B, Schindler E, Welters A, Dapper F, Hempelmann G: Influence of aprotinin on the thrombomodulin/protein C system in pediatric cardiac operations. *J Thorac Cardiovasc Surg* 1994; 107:1215-21

291. Turner-Gomes SO, Andrew M, Coles J, Trusler GA, Williams WG, Rabinovitch M: Abnormalities in von Willebrand factor and anti-thrombin III after cardiopulmonary bypass operations for congenital heart disease. *J Thorac Cardiovasc Surg* 1992; 103:87-97

292. Gando S, Tedeo I, Masio H, Goda Y, Kawahigashi H: [Increased fibrinolytic activity during cardiopulmonary bypass is caused by activated protein C system]. *Masui* 1994; 43:912-4

293. Boldt J, Knothe C, Schindler E, Welters A, Dapper FF, Hempelmann G: Thrombomodulin in pediatric cardiac surgery. *Ann Thorac Surg* 1994; 57:1584-9

294. Boldt J, Kling D, Zickmann B, Jacobi M, von Bormann B, Dapper F, Hempelmann G: Acute plasmapheresis during cardiac surgery: Volume replacement by crystalloids versus colloids. *J Cardiothorac Anesth* 1990; 4:564-70

295. Blauhut B, Harringer W, Bettelheim P, Doran JE, Spath P, Lundsgaard-Hansen P: Comparison of the effects of aprotinin and tranexamic acid on blood loss and related variables after cardiopulmonary bypass. *J Thorac Cardiovasc Surg* 1994; 108:1083-91

296. Chandler WL, Fitch JCK, Wall MH, Verrier ED, Cochran RP, Solow LO, Spiess BD: Individual variations in the fibrinolytic response during and after cardiopulmonary bypass. *Thromb Haemostas* 1995; 74:1293-7

297. Muller N, Popov-Cenic S, Buttner W, Kladetzky RG, Egil H: Studies of fibrinolytic and coagulation factors during open heart surgery: II. Postoperative bleeding tendency and changes in the coagulation system. *Thromb Res* 1975; 7:589-8

298. Brooks DH, Bahnson HT: An outbreak of hemorrhage following cardiopulmonary bypass. Epidemiologic studies. *J Thorac Cardiovasc Surg* 1972; 63:449-52

299. Ellison N, Jobes DR: Effective Hemostasis in the Cardiac Surgical Patient: Current Status, Effective Hemostasis in Cardiac Surgery. Edited by Ellison N, Jobes DR. Philadelphia, WB Saunders, 1988, p 200

300. Milam JD: Blood transfusion in heart surgery. *Clin in Lab Med* 1982; 2:65-85

301. Edmunds LH Jr, Ellison N, Colman RW, Niewiarowski S, Rao AK, Addonizio VP Jr, Stephenson LW, Edie RN: Platelet function during cardiac operation: Comparison of membrane and bubble oxygenators. *J Thorac Cardiovasc Surg* 1982; 83:805-12

302. Glusko P, Rucinski B, Musial J, Wenger RK, Schmaier AH, Colman RW, Edmunds LH Jr, Niewiarowski S: Fibrinogen receptors in platelet adhesion to surfaces of extracorporeal circuit. *Am J Physiol* 1987; 252:615-21

303. George JN, Pickett EB, Saucerman S, McEver RP, Kunicki TJ, Kieffer N, Newman PJ: Platelet surface glycoproteins. Studies on resting and activated platelets and platelet membrane microparticles in normal subjects, and observations in patients during adult respiratory distress syndrome and cardiac surgery. *J Clin Invest* 1986; 78:340-8

304. Rinder CS, Mathew JP, Rinder HM, Bonan J, Ault KA, Smith BR: Modulation of platelet surface adhesion receptors during cardiopulmonary bypass. *ANESTHESIOLOGY* 1991; 75:563-70

305. Rinder CS, Bohnert J, Rinder HM, Mitchell J, Ault K, Hillman R: Platelet activation and aggregation during cardiopulmonary bypass. *ANESTHESIOLOGY* 1991; 75:388-93

306. Beurling-Harbury C, Galvan CA: Acquired decrease in platelet secretory ADP associated with increased postoperative bleeding in post-cardiopulmonary bypass patients and in patients with severe valvular heart disease. *Blood* 1978; 52:13-23

307. Ray MJ, Hawson GA, Just SJ, McLachlan G, O'Brien M: Relationship of platelet aggregation to bleeding after cardiopulmonary bypass. *Ann Thorac Surg* 1994; 57:981-6

308. Zilla P, Fasol R, Groscurth P, Klepetko W, Reichenspurner H, Wolner E: Blood platelets in cardiopulmonary bypass operations. Recovery occurs after initial stimulation, rather than continual activation. *J Thorac Cardiovasc Surg* 1989; 97:379-88

309. Wachfogel YT, Musial J, Jenkin B, Niewiarowski S, Edmunds LH Jr, Colman RW: Loss of platelet alpha 2-adrenergic receptors during simulated extracorporeal circulation: Prevention with prostaglandin E1. *J Lab Clin Med* 1985; 105:601-7

310. Kestin AS, Valeri CR, Khuri SF, Loscalzo J, Ellis PA, MacGregor H, Birjiniuk V, Ouimet H, Pasche B, Nelson MJ: The platelet function defect of cardiopulmonary bypass. *Blood* 1993; 82:107-17

311. Ferraris VA, Ferraris SP, Singh A, Fuhr W, Koppel D, McKenna D, Rodriguez E, Reich H: The platelet thrombin receptor and postoperative bleeding. *Ann Thorac Surg* 1998; 65:352-8

312. Soslaw G, Horrow J, Brodsky I: Effect of tranexamic acid on platelet ADP during extracorporeal circulation. *Am J Hematol* 1991; 38:113-9

313. Dechavanne M, Ffrench M, Pages J, Ffrench P, Boukerche H, Bryon PA, McGregor JL: Significant reduction in the binding of a monoclonal antibody (LYP 18) directed against the IIb/IIIa glycoprotein complex to platelets of patients having undergone extracorporeal circulation. *Thromb Haemost* 1987; 57:106-9

314. van Oeveren W, Harder MP, Roozendaal KJ, Eijssman L, Wildevuur CR: Aprotinin protects platelets against the initial effect of cardiopulmonary bypass. *J Thorac Cardiovasc Surg* 1990; 99:788-97

315. Sloand EM, Alyono D, Klein HG, Chang P, Yu M, Lightfoot FG, Kessler C: 1-Deamino-8-D-arginine vasopressin (DDAVP) increases platelet membrane expression of glycoprotein Ib in patients with disorders of platelet function and after cardiopulmonary bypass. *Am J Hematol* 1994; 46:199-207

316. Wildevuur CR, Eijssman L, Roozendaal KJ, Harder MP, Chang M, van Oeveren W: Platelet preservation during cardiopulmonary bypass with aprotinin. *Eur J Cardiothorac Surg* 1989; 3:533-8

317. Wachfogel YT, Kucich U, Greenplate J, Glusko P, Abrams W, Weinbaum G, Wenger RK, Rucinski B, Niewiarowski S, Edmunds LH Jr, et al: Human neutrophil degranulation during extracorporeal circulation. *Blood* 1987; 69:324-30

318. Musial J, Niewiarowski S, Rucinski B, Stewart GJ, Cook JJ, Williams JA, Edmunds LH Jr: Inhibition of platelet adhesion to surfaces

## ANTICOAGULATION MONITORING DURING CARDIAC SURGERY

of extracorporeal circuits by disintegrins. RGD-containing peptides from viper venoms. *Circulation* 1990; 82:261-73

319. Shore-Lesserson L, Fisher C, Ammar T, Sarier K, DePerio M: Comparison of hemoSTATUS with flow cytometric analysis of platelet function during cardiac surgical procedures (abstract). *Anesth Analg* 1997; 84:108

320. Metzelaar MJ, Korteweg J, Sixma JJ, Nieuwenhuis HK: Comparison of platelet membrane markers for the detection of platelet activation in vitro and during platelet storage and cardiopulmonary bypass surgery. *J Lab Clin Med* 1993; 121:579-87

321. Rinder CS, Bonan JL, Rinder HM, Mathew J, Hines R, Smith BR: Cardiopulmonary bypass induces leukocyte-platelet adhesion. *Blood* 1992; 79:1201-5

322. Abrams CS, Ellison N, Budzynski AZ, Shattil SJ: Direct detection of activated platelets and platelet-derived microparticles in humans. *Blood* 1990; 75:128-38

323. Valeri CR, Feingold H, Cassidy G, Ragno G, Khuri S, Altschule MD: Hypothermia-induced reversible platelet dysfunction. *Ann Surg* 1987; 205:175-81

324. Valeri CR, Khabbaz K, Khuri SF, Marquardt C, Ragno G, Feingold H, Gray AD, Axford T: Effect of skin temperature on platelet function in patients undergoing extracorporeal bypass. *J Thorac Cardiovasc Surg* 1992; 104:108-16

325. Michelson AD, MacGregor H, Barnard MR, Kestin AS, Rohrer MJ, Valeri CR: Reversible inhibition of human platelet activation by hypothermia in vivo and in vitro. *Thromb Haemost* 1994; 71:633-40

326. Aldea GS, Shapira OM, Treanor PR, Lazar HL, Shemin RJ: Effective use of heparin-bonded circuits and lower anticoagulation for coronary artery bypass grafting in Jehovah's Witnesses. *J Card Surg* 1996; 11:12-7

## Appendix

### *Summary of a 1993 Survey.*

In 1993, 1,665 members of the Society of Cardiovascular Anesthesiologists (SCA) and American Society of Extracorporeal Technology (AmSECT) received a questionnaire designed to characterize their current clinical practices of heparin anticoagulation and reversal and monitoring for cardiac surgical procedures involving cardiopulmonary bypass (CPB). Of the 1,665 questionnaires sent, responses were received from 63% (n = 1,049) of SCA or AmSECT members; of these 1,049 responses, 967 (92%) were selected to eliminate duplicate responses within the same institutions: The survey results must be evaluated with caution. The lack of fully completed questionnaires and the age of the survey constitute significant limitations. Because not all

respondents answered all questions, the total numbers reported are sometimes much lower than expected because they represent the numbers of responses to each individual question.

Body weight was the method used by 95% of respondents to determine the initial heparin dose, which was 300 U/kg for 67% of respondents and 400 U/kg for 16% of respondents. Bovine lung heparin was used in 67% of centers, whereas 19% used porcine mucosal heparin, and the remaining 14% used both preparations. Heparin management was monitored by 99.5% of the respondents, and the most common tests used were activated clotting time (ACT; 99%) and blood heparin concentration values (16%). However, 34 of 967 (3.5%) respondents did not measure the ACT before initiation of CPB. Celite ACT (Hemochron instrument) was used in 70% of centers surveyed, whereas kaolin ACT (either ACT or Hepcon instruments) was used in the remaining 30%. The target ACT and the trigger for additional heparin administration during CPB was between 400-480 s in most centers (81%); trigger ACT values of 400 and 480 s represented 41% and 32%, respectively, whereas an additional 8% used a value between 400 and 480 s. The median acceptable ACT value was 400 s, but this included values ranging from 240 s to 1,000 s. For 153 of 967 respondents, heparin concentrations (levels) were monitored during CPB, and most (92%) respondents who monitored heparin concentrations maintained levels between 3 and 4 U/ml (IU), with 64% at 3 U/ml and 19% at 3.5 U/ml. Using data from the 721 replies to this question, 85% of clinicians routinely added heparin to the CPB circuit priming solution. Of the sites that added heparin to the CPB circuit, 74% added between a median value of 5,000 U (30%), but the dose varied from 100 U to 50,000 U. Of 777 responses, the median and mode CPB priming volume value was 2,000 ml, with a 95% confidence interval of 1,400-2,500 ml.

The technique used to determine protamine dose varied between institutions. Of 474 respondents, 47% (223) determined the protamine dose based on a fixed ratio (e.g., milligrams protamine per milligrams heparin, with 1 mg heparin = 100 U heparin) to the total dose of heparin administered. An additional 44% used one of the following four methods to estimate residual heparin concentration: (1) 40% used whole blood protamine titration heparin concentration, (2) 3% used manual protamine titration dose-response, (3) 1% used the protamine response test, and (4) 0.2% used Sonoclot. Of the centers that used a fixed ratio of protamine-to-heparin dose (n = 225), 77% used a ratio between 1 and 1.5 to 1, the most common ratios being either 1.3:1 (31%) or 1.5:1 (23%). Using 891 responses, protamine was administered over a 5-min period in 35% of centers and over a 10-min period in 43% (both mode and median) of centers, and 91% of respondents infused protamine over a 15-min period or less.
